# Supplementary material for: Genetic Variation in the Proximal Promoter of ABC and SLC Superfamilies: Liver and Kidney Specific Expression and Promoter Activity Predict Variation
Source: PLoS One. 2009 Sep 9;4(9):e6942. doi: 10.1371/journal.pone.0006942 (PMC2735003; doi:10.1371/journal.pone.0006942)
Supplement: Table S2 — (0.14 MB XLS) [file pone.0006942.s002.xls]

## Sheet: Table S2
Supplemental Table 2. All Polymorphisms identified in the proximal promoters and 5' flanking sequence as of July 2009 dbSNP build 130
Novel Polymorphisms
Novel Polymorphisms already submitted to dbSNP
gene	rsId	chromosome	position	preFlankingSequence	alleles	postFlankingSequence
ABCA12	72557999	2	215711885	TAGGGAAAGTGTCCACCTTTAACCT	A>G	AAGTTGAATGTTTCGATTTTGGGGG
ABCA13	72557997	7	48208189	TTCTGCCTTGAAACATGAGTACTGA	C>T	CCTGGAAGAAAGGTGTTAGATATAA
ABCA13	72557998	7	48208191	CTGCCTTGAAACATGAGTACTGACC	C>T	TGGAAGAAAGGTGTTAGATATAAAG
ABCA4	72558000	1	94359527	ATGAGAGGGGTTCCTGAGGGGGATG	T>A	CTTTAGGTATCTTTGACCTTAAGTT
ABCA5	72558001	17	64835010	CGCTCCGCGTACGGGCGCGCTTCAG	A>T	CGCTCGGCCCCGCGCGTCCCGGCGC
ABCA5	72558002	17	64835033	AGACGCTCGGCCCCGCGCGTCCCGG	C>G	GCACGCAGGCAAGCAGCGCGCCCGG
ABCA5	72559403	17	64835063	GCAGGCAAGCAGCGCGCCCGGAAGA	G>A	GAGAGCGGCTGAGGGTGGGGCGAGC
ABCA6	72559404	17	64649727	AGCCAATTATTCTGCAAGGAAATGA	C>T	TGTTCCGTGGTTGGTTGGGAATAAA
ABCA6	72559405	17	64649793	GTTCACTTAGCCTTTCAACTACAGG	G>A	ATAAGGGGGAAAACGGTAAACAAGG
ABCA6	72559406	17	64650065	ATAAAGCTAAGCAATCCATAGTACG	C>T	CTTGGAGAAACTCCTAGGACAGACA
ABCA9	72559411	17	64568778	CCCAGGAGAATTTGGTCTCAGTTCA	G>T	CTAGCCTGCCAAAATATCTTCTGCT
ABCA9	72559412	17	64568880	TCAGCAGGGAGTTTGTAGTTGCAGA	T>C	GGTTGGCTGGACATATCAAAACATT
ABCA9	72559413	17	64568914	GGACATATCAAAACATTAGGAACTA	T>A	CAAACCAAGGAGAATCTAGCCTTTC
ABCB10	72559415	1	227761045	CATGGCGCTGCGTGCGACCCGTACG	C>T	CTCAGCCCGCCGGCCAGGCGCGCGC
ABCB10	72559416	1	227761095	CAAAGCCCGAGGACCCTCCCGGCCC	G>C	GCCCCGAGCAAAGGGCGTGGACGCG
ABCB10	72559417	1	227761108	CCCTCCCGGCCCGGCCCCGAGCAAA	G>A	GGCGTGGACGCGGTGGCGCCCGCCC
ABCB10	72559419	1	227761363	GAGCGCCGGGCGCGCCAGCTGGGAC	G>A	AGGCCCGGGAAGCCCAGGAGCACGG
ABCB4	72559420	7	86943023	CGCGTCCGGCCCGGGAAACGCCTAC	C>A	GTTGCAGCCAGGGCGAGGGCCGCGG
ABCB5	72559422	7	20653168	TCCTAGCTTGAGGGATTCTTTTCTT	A>C	TTTGACTTTTTGCAGAGATGAGTCT
ABCB7	72559421	X	74293006	AGCCTCTTTTATTTGTTTTTCCTTA	G>A	GGCCGAGCTTTGATTGTTTTCCTTA
ABCB8	72559423	7	150356433	TGTCTTTTCACCAATCACCGCCAAG	G>T	CGCGAGGGGGTTGTCGGGATGGGGG
ABCB9	72559424	12	122017326	CCAGCTTTTTAACTGGCCTTTTTCC	C>-	TGGAGGGACAGCCAGCCAGTCCAGG
ABCB9	72559425	12	122017327	CAGCTTTTTAACTGGCCTTTTTCCC	T>A	GGAGGGACAGCCAGCCAGTCCAGGA
ABCC11	72559426	16	46826602	TATTCAAATACACCTGCAAAGAGAG	G>C	TAACGAAGGTTTCACAACTAGAGAT
ABCC11	72559427	16	46826834	AGTGTGACTCTTTCCTATTCAAGAT	T>C	CATCCAGGAAACTAACGACATGGAA
ABCC11	72559428	16	46826965	AACGAGCTCGAGCTCAGCCACACAT	T>G	AGCTTGGGCCTCCTTCCAGTTCCAT
ABCC2	17222660	10	101530945	TTGTCATATACCTGTTGGCCATTTA	T>C	ATGTCTTCTTTGGAAAAGTGTCTGT
ABCC2	17222653	10	101531029	GTATGTTTGCTATTGAGTTGTATGA	G>A	TTCCTTATAGTATATTGTGGATATT
ABCC2	17222646	10	101531353	CATGTTCCTGTGTTTCTTATAATCC	G>A	GTAGTTAGATCTAGAATTTGACCAG
ABCC2	17216128	10	101531527	ACAAAAGGTTGGGTCAGGTGGGGCA	C>A	GGTAGCTCATGCCTGCAATCCCAGC
ABCC2	45593436	10	101531532	AGGTTGGGTCAGGTGGGGCACGGTA	G>GG	CTCATGCCTGCAATCCCAGCCCTTT
ABCC2	17222533	10	101531794	TCTAGCTCAGGCAACAGACCAAGAC	C>A	CTGTCTCAAAAAACAAAAAACAATA
ABCC2	17216135	10	101531859	GGTTGGGTCGATGACAGTTTCTAGC	G>A	ACTGATGCCACCACTCTGTTTACAG
ABCC4	72557964	13	94751732	TGAGAGGCGGGGACGGGGCGTGCCG	C>T	CGGCGCCCGGCTCCCGGAAGCGGCT
ABCC4	72557963	13	94751797	ACGCGGTGCGCAGCTCCCGGGCTCC	A>G	GGCGGCGGCGCGTAGCGGGCGCCCC
ABCC4	72557962	13	94751858	TTCGCCTCCTCCCGCCGCGTCTCCT	C>G	CCGCCGCGTCACCCGTCGGTCCCGG
ABCC5	57683047	3	185218402	AGCGCGCTTGCGCGGTGTGGCGGCC	G>A	ATGCCGCTATAAAGGCTTGTTTTGC
ABCC5	57252189	3	185218430	TCCCTTCAGCCTTGGGAATGCTTTG	T>C	GCAGCGCGCTTGCGCGGTGTGGCGG
ABCC5	58545911	3	185218486	AAATGTAGTCCTTCGCCGCGTCCGC	A>C	GCCCTGGGCACTCGGAAGGAGGACT
ABCC5	58430716	3	185218531	AGGGGCAGCCCGCACCGCCCCCGGG	A>G	TGTCACCGGCGCTTCTGGGAAATGT
ABCC5	60515980	3	185218545	AGCTCGGTGGGAAGAGGGGCAGCCC	G>C	CACCGCCCCCGGGATGTCACCGGCG
ABCC5	59577904	3	185218548	GGGAGCTCGGTGGGAAGAGGGGCAG	C>T	CCGCACCGCCCCCGGGATGTCACCG
ABCC5	59155292	3	185218584	GTCTCGCAGAGGCACGGGGAAGGAT	G>A	GAACAGAGCCGGGAGCTCGGTGGGA
ABCC5	60553229	3	185218603	CCTGAGAAGATTCCAGACAGTCTCG	C>T	AGAGGCACGGGGAAGGATGGAACAG
ABCC5	58029419	3	185218676	CTACGAACAGCACTGTGTGCGAACA	C>T	AGGGCCACGGTTAAGCCTCCCGGCT
ABCC5	59502966	3	185218784	ACTGGGGCTGGCCGGCCTGACGACT	C>G	TCAACGGGTTAGACGCGGGCTACGA
ABCC5	58782997	3	185218788	AAGAACTGGGGCTGGCCGGCCTGAC	G>C	ACTCTCAACGGGTTAGACGCGGGCT
ABCC5	60671402	3	185218874	CAGTTGGTGTTAAAGTGAGAAAGGC	G>A	GTATCTGCGCAGACTGCAGGGTCGA
ABCC5	57978833	3	185218915	CATTTTATTATCTAGAGACCAGGCA	G>A	CGAGACATTGATGGGCAGTTGGTGT
ABCC8	72559430	11	17454987	CGCCTCTGTCCCTTGCAGCTCCGCC	G>T	CCCGGCCCGGCCGTCAGGCCCCCGC
ABCC9	72559432	12	21980886	AAATGAAAGGCTCATTTCTTCTTAT	A>G	TGGTTTACTCTAAAAGGGAGAGAAA
ABCC9	72559433	12	21981011	ATAAAATTAATCCCTTTTACTTTGA	T>C	AGCTGAGGAAATAAGAAACTCTGTG
ABCC9	72559434	12	21981200	TGTCTGACTAAAATGCTTTCAAAGA	A>G	CAAAAATGGTCATATATTAAGAAAA
ABCC9	72559435	12	21981209	AAAATGCTTTCAAAGAACAAAAATG	G>A	TCATATATTAAGAAAAAGGAGAAAA
ABCD2	72559439	12	38300531	CCGGAGAATGCCAAATATCAAATAC	A>G	CTTGGATCTGTTTTTCACAGATCCC
ABCD2	72559440	12	38300559	TGGATCTGTTTTTCACAGATCCCCC	C>T	GGCTTTTTTGGGGGTCTGATTTCAC
ABCD3	72559436	1	94656470	AGTACAAAGTGGGCTCCAGAGCGCG	G>A	GCGGCGCGGCGGCGCGAGCCAGGGG
ABCD3	72559437	1	94656502	CGGCGGCGCGAGCCAGGGGGCGGTC	C>T	TGCGCGGCCGGCCCCGCCCTCTGCT
ABCD4	72559441	14	73839483	GAGACGGCGTTTGATAGAGAGGAAG	G>A	TGCGGGAGACGCGGACTCTCCCGGA
ABCD4	72542403	14	73839489	GCGTTTGATAGAGAGGAAGGTGCGG	G>C	AGACGCGGACTCTCCCGGAAGCGAC
ABCD4	72542404	14	73839604	TTCTGGGAGACTTCCCTTTTGACAA	T>C	AGGTATCCGAGAGTGTAACTACTTT
ABCD4	72542405	14	73839652	TTTATGGCAAGTATTTTAGATTCTG	T>A	GTATAATAGATGTTTTACATATTCT
ABCD4	72542406	14	73839733	GTATAAATTAGGCTTCCAGCCGGGC	C>G	CGGTGGGTTACTCCTGTAATCCCAG
ABCD4	72542407	14	73839759	CGGTGGGTTACTCCTGTAATCCCAG	C>A	ACTTTGGAAGGCCAAGGCGGGAGGA
ABCD4	72542408	14	73839836	AGCCTGGGCAACATGGCAAGACCCC	G>A	CCTTTACAAAAGACAAAAGCATTAG
ABCD4	72542409	14	73839850	GGCAAGACCCCGCCTTTACAAAAGA	C>T	AAAAGCATTAGCCGGGGATGGTGGC
ABCF3	72542417	3	185386354	CTCCCACCCGCCAGACCACGGGTGC	C>G	TCGCGGCCCCGATAAACCTTGAGCT
ABCF3	72542418	3	185386493	AGGTGTCGCGCACGCGCAGAGAGCG	C>T	GGCTCCGGCGCAGACTCGGCGCCTC
ABCG1	72542411	21	42512018	TTGAGGCTTGGAGGCAGTGGATTTC	C>T	GAGCCTGGGAACCCCGGCGTCTGTC
ABCG1	72542412	21	42512078	CGCAGCCTCACCCGTGCTGGCCCAG	C>T	CCCCGCGAGTTCGGGACCCGGGGTT
ABCG1	72542413	21	42512097	GCCCAGCCCCCGCGAGTTCGGGACC	C>T	GGGGTTTCCGGGGTGGCAGGGGGTT
ABCG1	72542414	21	42512230	GCAAAACAAGAGCACGCGCACCTGC	C>T	GGCCCGCCCGCCCCCTTGGTGCCGG
ABCG1	72542415	21	42512237	AAGAGCACGCGCACCTGCCGGCCCG	C>A	CCGCCCCCTTGGTGCCGGCCAATCG
ABCG1	72542416	21	42512319	CCAGAGCCGGAGCCGGATCCCAGCC	G>C	GAGCCCAAGCGCAGCCCGCACCCCG
ABCG2	61181041	4	89299119	CTCACCCCCGCCCGCGAACCCCGAC	C>T	TGGGGAAACCCGGGGCGCTGGGGAG
ABCG2	61535534	4	89299186	CAGGACACGTGTGCGCTTTCAGCCG	G>C	GTCGCAGGGCGCTTATCGCGGCCCG
ABCG2	57327643	4	89299301	CATTCCGTTCGATCCCGGAGGCGGG	A>[-------]	GTGTTTGGCTTGTCCCTGCGTGTCA			-/AGTGTTT
ABCG2	58132660	4	89299459	TGGGTGCGAGCAGCGCTTGTGACTG	G>A	GCAACCTGTGCGTCAGCGTCCCCGG
ABCG2	59370292	4	89299518	GCGCAAGCATCCACTTTCTCAGAAT	C>T	CCATTCACCAGAAACCACCCATTTA
ABCG2	59172759	4	89299519	GGCGCAAGCATCCACTTTCTCAGAA	T>A	CCCATTCACCAGAAACCACCCATTT
ABCG4	72542421	11	118524843	CAACCCCCAGTCCTGAGTTCACCCC	T>G	GCACCTCCTCCGGCCCCCGCGCCGC
ABCG4	72542422	11	118524857	GAGTTCACCCCTGCACCTCCTCCGG	C>T	CCCCGCGCCGCAAGCGCTGCTCTCT
ABCG4	72542423	11	118524898	GCTGCTCTCTCCTTTGCCGTCCTCG	C>CC	CCCCCGCGGGCTGCCGGGCGGCGCG
ABCG4	72542424	11	118524992	AGAGCGCAGTCGCCCCGCGGGCTCG	G>A	AGGACACAGCGTCCGGGACCAGGCT
ABCG5	72647315	2	43919682	TAAGAGAGCTGCAGCCCAGGGTCAC	A>C	GACCTGTGGGCCCCATGGCCGGGAA
ABCG5	72647316	2	43919747	GAGGGCTGCCGAAAGGGGCCACTCC	C>A	CAGGATACCTCGGTGAGTGAGCAAT
ABCG5	72647317	2	43919856	TCAGGAGCCTTCTGTCCTAGCACCA	C>A	CCGGACATCAAGCAGTGTGAGGACA
ABCG8	72542425	2	43919150	GAGCGCCGGGCCCCGCACTCCTGGG	G>A	GAGCAGCAGCAGCAAGGGCTCTGCC
ABCG8	72542426	2	43919184	GCAGCAAGGGCTCTGCCTTACCTGA	C>A	GCTGTAGGAGGCATGGAGGATGCCC
ABCG8	72542427	2	43919273	CAGGGAGCTCTGGGAGCCTCTGTTT	A>C	CTTGGAGACCCATGGACCCTCCGGG
ABCG8	72542428	2	43919296	TTACTTGGAGACCCATGGACCCTCC	G>A	GGGGTCAAAGATGAGAGGTCACCCA
ABCG8	67374873	2	43919511	GTACCTTTAGCCAGCGCGTCCTTAT	C>G	TTGACAGTGGGCAGAACACACACGT
SLC13A1	28364176	7	122627317	CTAGGGCAGTGAGTGAAGGTGACAG	G>C	CTGGAAAAATATTAATCCAAGTTGG
SLC13A1	28364171	7	122627348	TGAGATTTAATTTTAACTTGTGTTG	G>T	TCGGTCTAGGGCAGTGAGTGAAGGT
SLC15A1	60228277	13	98202873	AGCACGTCCCGCCGGCAGGTCGCAG	G>-	AGCCCTGGGAGCCGCCGCCATGGGT
SLC15A1	8187815	13	98202926	GGGGCAACGGGGCCGGGCCTGGACG	T>C	CAGGTCGGAGGAGTAGCACCTGCCA
SLC15A1	61072945	13	98203019	CGCGACGGCTCGGGAGCACGGACCT	C>T	TGCTCCCCGCAGCACCGCCCCCCGG
SLC15A1	56846943	13	98203049	CCCGCACCTGGGCCGGGGCTGGTGT	C>T	CACGCGCGACGGCTCGGGAGCACGG
SLC15A1	60933979	13	98203108	GGGAATCCGCGTTTAGACTGGCTCT	C>T	CCCCGGCCTGCCACGCGCTCCCGTC
SLC15A2	72557985	3	123095860	AGCTTCCTGCTTTGCTCTGGATCAG	G>C	AAGCTATTGAAGCTGACACCCACAG
SLC15A2	72557986	3	123095920	CAGTTGCTGAAGCCACCAGCTCCCC	C>T	TCCCAGTCCTTCTTTTCAGAGTAGG
SLC16A1	60844753	1	113300598	GGACCCAAGGGCGAGTCTGGCAGGG	C>G	GTGGTAGCTCCGCGCCGCTCAGCAG
SLC16A1	60145006	1	113300611	GCTCGTCAGACAGGGACCCAAGGGC	G>A	AGTCTGGCAGGGCGTGGTAGCTCCG
SLC16A1	60545256	1	113300615	TAGAGCTCGTCAGACAGGGACCCAA	G>A	GGCGAGTCTGGCAGGGCGTGGTAGC
SLC16A1	60423574	1	113300673	TCTGGCAGAAACTGAGGGGTGAGAC	C>T	GATGGTTGTGTCCCGAACGAGGGCA
SLC17A2	72542432	6	26039119	CTGAAATCAGTGATGGAGTCAGACC	C>T	ATATTCACTTCCTAGTGTTTTCCCT
SLC17A2	72542433	6	26039131	ATGGAGTCAGACCCATATTCACTTC	C>G	TAGTGTTTTCCCTGAGCTTGGACAA
SLC17A2	72542434	6	26039176	GGACAAGTCACTGAACCTCTTTGAA	T>C	TGGCTTCCGCTTTAGTAAAGCAAGG
SLC17A3	72542435	6	25982410	CTGTGGAAGGGCTTCAAGTTGAACC	C>G	AGCGTTTCCTCCAAGCTTACTCCCT
SLC17A3	72542436	6	25982454	ACTCCCTTGGACTTTTTGGAGCAGA	G>A	AGATGAGGATTCTTTGCCACCCTAG
SLC17A3	72542437	6	25982478	AGAGATGAGGATTCTTTGCCACCCT	A>G	GGGCTTAAGTTGCTAATCATTAATA
SLC17A3	72542438	6	25982553	CTCAGAAGGGCTTCTTGCCAAATAG	G>A	CTTTGAAGAAGCATTCGGAAATCCA
SLC17A3	72542439	6	25982586	GAAGCATTCGGAAATCCAGCCCAAT	C>G	CCCTCTGCAGTTCTTTCTGCTTTTT
SLC17A3	72542440	6	25982741	TGGTGTCTTCAATGTCTTTAGTCTT	T>C	TTTGAAAAGGTTAAAAAGAGATAAA
SLC17A3	72542441	6	25982761	GTCTTTTTTGAAAAGGTTAAAAAGA	G>C	ATAAATTATAATTAAAGAGTTCAGT
SLC17A3	72542442	6	25982852	TTAATTGAAATTTTGTTAATTTTTT	T>-	CTTCTTTGAAATATGTGAATTGTAA
SLC17A6	56676024	11	22316076	ACTTACGCTGGCGTGATGGGAGGAG	A>T	TCATGGGCAGAGAGGAAAAACTAAT
SLC17A6	59555811	11	22316101	ATCATGGGCAGAGAGGAAAAACTAA	T>C	AGCAGCATTGCTCACCTGAGACCTG
SLC17A6	57419597	11	22316151	GAGATGCTCCCATGAGTTTTGAATA	T>C	GCTCTGCTCCTTACAGCAAAGACAC
SLC17A6	57157277	11	22316205	TTTTAAAAGTACCATTCTTTTGACT	T>A	TGCTGTTCCCAAGGCTTCTGTGATA
SLC17A6	61361436	11	22316227	ACTTTGCTGTTCCCAAGGCTTCTGT	G>A	ATATTCCGGCCCCTCCGTTTAAAAG
SLC17A8	57368499	12	99274854	CAGGCGAGCTGGGGTGGGGCAGGAG	G>C	GGGACGCGGCTGGCTGGAGGGGCTG
SLC17A8	58651147	12	99274857	GCGAGCTGGGGTGGGGCAGGAGGGG	G>A	ACGCGGCTGGCTGGAGGGGCTGGAG
SLC17A8	60738448	12	99275055	CGTGCAGCTTTTGCAAGGGACTGAA	T>C	TCCCAGCCAGACACCCCTTGGACTC
SLC17A8	59543127	12	99275097	CTTGGACTCTTTTTTGGAGGGGTGG	G>A	GAGCAGAGAGAGGAGGGAGTTGTCT
SLC18A1	60485565	8	20085172	GACCCAGGCAAGAGTTAAAGAGTTC	G>T	ATGATAGATAAGCACAGATGCAAAA
SLC18A2	60543597	10	118990562	CCAGCCCCCCGCCCCCGCTCCCTCC	G>A	GCCGTGACGTCAGAGCCGGACGGGG
SLC18A2	60987089	10	118990681	CCCACTGCGGTGCGGGCGTTGGCGC	G>A	GGCACGGAGGACCCGGGCAGGCATC
SLC19A1	61490678	21	45787048	TGGCACCCCAGGATGCTGACGCCGG	C>T	GGGGGTGGGGGCCCGAGGGGCGGTC
SLC19A2	72542443	1	167721823	GACGCCTCTAGGGTCGCTGCCTGAT	C>G	GCCCAGTTTAAGGGAGACCCGTCCT
SLC19A2	72542444	1	167721824	ACGCCTCTAGGGTCGCTGCCTGATC	G>T	CCCAGTTTAAGGGAGACCCGTCCTA
SLC19A2	72542445	1	167721947	TCCATTGGTCGTGGGTCACACGACG	T>G	GAACTGGGGCGGTGGCAGCACGCCA
SLC19A2	72542446	1	167722200	GTTTATCATTCTTATTCACCGTCTC	C>T	GGAATGTCCATTCAGTTTCCGCTCC
SLC22A1	60541448	6	160462729	GCTTAGACCCCACTGACTCGCTCCC	G>A	GGCAAAGCAAACGATTTGATCAGAT
SLC22A1	58812592	6	160462757	CAAAGCAAACGATTTGATCAGATGG	C>G	CACGTGCATTCTTCCTTTTCCTGAA
SLC22A10	72542451	11	62813923	GAGTCACTTGAGGACAAACATATTT	G>A	GAGAGAGTAAACCTTTAAACGGATT
SLC22A10	72542452	11	62814005	AATAATGATCTCTATGACTACAAAA	T>C	AACATCTACCTCCTGATAGCAAAAG
SLC22A10	72542453	11	62814014	CTCTATGACTACAAAATAACATCTA	C>A	CTCCTGATAGCAAAAGAACTGAGGA
SLC22A10	72542454	11	62814016	CTATGACTACAAAATAACATCTACC	T>C	CCTGATAGCAAAAGAACTGAGGAAG
SLC22A11	59161142	11	64079467	CGTTTTCTGATTTAAAGGGCCTCGC	G>C	TAGAAGGTTCTAAAGATTTAAGAAT
SLC22A11	56791907	11	64079680	CCCTGTCTTTTTAAATAGAATCTGC	C>[----]	TGACTTTCACTTTTGGTGCTGGAGA
SLC22A12	72557987	11	64114665	GTGAACCAAGACGCTGGGTTCCAGG	C>A	CAGACACTGTGACATGAGAGGCCAT
SLC22A13	72542447	3	38281934	CATGTGCCATGGTGGTTTGCTGCAC	C>T	TATCAACCCATCATCTAGGTTTTAA
SLC22A13	72542448	3	38282001	ATATTTGTCCTAATGCTCTCCCTCC	C>T	CTTGTCCCCCACCCCCTGACAGGCC
SLC22A13	72542449	3	38282180	TCATCCATGTGGACTATTTTTTCAT	C>T	ATATTCTACCCTTCCCAAGTCACAC
SLC22A16	72542457	6	110904519	GAGTTAGCCGAGCTCCGGGGGCTGC	G>A,T	GGTAGCGCGCCCCGCCCCGAACCTC
SLC22A16	72542458	6	110904589	TCCCCGCGCGTCCCAGTGCTCGGGA	C>T	CAGCGCGACGCTGTATTCTGTTCCT
SLC22A16	72542460	6	110904645	CGTCGCTTGGCCCCTCGGTCCCCCC	A>T	AGTATCTTCGGCTTTTTTCCTGCCG
SLC22A16	72542462	6	110904811	ATGTCTGCGGGGTCGCCACGCTCGA	G>A	GGAAGCCCCGACGCCTGGGAAAAGT
SLC22A17	72542463	14	22891489	GCTCCGTGGGCACCGCATCTCCGAG	G>A	GTCCCGACCTGCTGTTGGGGGGCAG
SLC22A17	72542464	14	22891559	GAAGCGGAGGAAACCGCAGAGCAAG	G>T	GCAGGGGGCAGGTGGGAGGGAGGGC
SLC22A17	72542465	14	22891770	CCCCGCCATTGGGCTCGGGGGTCCC	G>A	GTGGCCACCCGGGGAGCCAGCTTGC
SLC22A18	72542473	11	2879714	TTCCTCCGCTTTTCTCTCCCCGCCC	C>T	TGCCTCCCCTCCATTCTCTCCTTCC
SLC22A18	72542474	11	2879984	GTGAGAGCGCAGAAACCGTGGCACG	G>C	GCGCTCCCGGAACTGGCGATTGCAA
SLC22A2	59310119	6	160599989	CTGGGAGTGAGCTCAGGGCATTTGG	G>A	AAGTGCAGAAGGACATGCACCCCCG
SLC22A2	60249401	6	160600203	CATAGGGCCTTGAAGAAAAGCTGGC	G>A	GTGCGCATGAGATAGGAGTATATTA
SLC22A2	59705803	6	160600215	GTGTGTTTTCTCCATAGGGCCTTGA	A>T	GAAAAGCTGGCGGTGCGCATGAGAT
SLC22A2	58752784	6	160600547	ACACAAAGATAGTGGCTTGGACACA	C>T	CTGCCTGCATTTACACTTGACCTGT
SLC22A3	58601841	6	160689269	GTGGCCCGGGGCTGCTGCGGGCGCC	C>G	GGGGAAGAGAGGCGGGGGCCGCGGG
SLC22A3	59711975	6	160689291	GCCCGGGGAAGAGAGGCGGGGGCCG	C>G	GGGGGGCAGGAGGAGCGGCTGCGGC
SLC22A3	60515630	6	160689334	GCTGCGGCCGGCACAGCGCCAGGGC	G>[--]	AGTGAGGCGGGTGGCGCGGGGGAGG
SLC22A4	72557988	5	131657872	CCAGCCTGGAAGCCCCCGTCAGGTC	C>CGGGC	TTGGGGGCGGGCGGGCGCGCGAAGC
SLC22A4	72557989	5	131657923	ACAGGGCGGAGACAGCCGGGAGCCC	A>T	GCCTCCCGGGCTGGGCCGCCCTCCC
SLC22A4	72557990	5	131657953	CCCGGGCTGGGCCGCCCTCCCCTTC	C>T,G	CCGCGCCGGGCCGGGGATGGGGGTG
SLC22A4	72557991	5	131657994	GATGGGGGTGTGGTCCCAAGTGTAC	A>G	GTGGCATCAAGCTCAGCGCGAGCTC
SLC22A4	72557992	5	131658025	ATCAAGCTCAGCGCGAGCTCCCGGG	A>G	ACGCTCCAACGCCTTCAGCCTGTTT
SLC22A5	57961304	5	131733172	GCTGCCTTCCTAAGCCGAGCCCGGG	C>T	TACCTCGGTCGTCCCCAGCAGGCTT
SLC22A5	60978556	5	131733245	CCAGGTCCCCAGGACAGGCCCCGCC	C>A	GGGCCTCAGGTGCACTCCCGGCCCG
SLC22A6	56986806	11	62509033	CAGGCCAAGGATTAAAAACTGCCCA	T>C	GCAAGGGTCAGGTCTCCAGCAGACC
SLC22A7	56927599	6	43373859	ACCTCTGAATGGATGGCTTCCCCTT	C>T	CCCCAGGCACCAGGCAAGACAGGTA
SLC22A7	60768686	6	43373971	GATTCTGGCTGCAGGCTCTCCAGTC	C>T	ATCCACTCCCACCTCCAGAGTCCAA
SLC22A8	60125021	11	62539849	TGAGCTGCCCTACTACAGCAGCTGC	C>T	GGCCCCTAGGACAGAGCAGGGACCT
SLC22A8	59909703	11	62540127	CTCGCGTTGGGCGGATGTACAAAAC	G>A	GAGGCACGTCTCAGACTTCCCATTT
SLC22A9	72542467	11	62893499	ATTCTGTCCACATTTCAAGCAATGT	A>G	TTTCCAGCATGAATTTGTGGTGTGA
SLC22A9	72542468	11	62893698	AAGTAAAAAAAGCACCTCACCTTTG	A>G	GTCGCCAAAATTATGCTTCCTGGAA
SLC22A9	72542469	11	62893714	TCACCTTTGAGTCGCCAAAATTATG	C>T	TTCCTGGAATGACCGCATACCATGT
SLC22A9	72542470	11	62893797	TGTAGACCAAAGTCCAGTGCTGACT	T>G	TGGGAGCTACTAAAGACATGAAAAA
SLC28A1	61490634	15	83228661	GGAGGAGGGGAGCAGTGTGTCAGGA	C>T	ACCCCGGATGGGACCTGTGACAGCA
SLC28A1	57860625	15	83228710	CAATGACACCTGCCAGCCTGATGCC	G>A	CTTGACTCCCTGCCAGGTACTTCCT
SLC28A1	60945984	15	83228747	GCCAGGTACTTCCTAAGCAGGAGCA	C>T	GCTGACTCCTCATGTGCTCTATTAC
SLC28A2	60273882	15	43331485	TTATCCTGGCTGGTCTCAAGCGATC	C>T	GCCCGTCTCGGCCTCCCGAAGTGCT
SLC28A2	60354957	15	43331712	AGCTGCCCCTCCTCCCTCGCAGCTG	A>T	GCTTTTCTTTCAGTCCTTCACTGAG
SLC28A2	61553676	15	43331725	CCCTCGCAGCTGAGCTTTTCTTTCA	G>A	TCCTTCACTGAGGAGCCAGAGGGAA
SLC28A3	61541859	9	86173466	TCTAACTCCAGGCTGCACAGCCCTC	C>G	GCTGCATAAGACACTCCTTCCTTCC
SLC28A3	56720011	9	86173642	CTGGCATGACTTCATCTTCTACCCC	C>-	TCTCCCCAGTTCCTCCACCCTGACC
SLC29A1	72548774	6	44294919	AGGACAGTGAGGAGTACAGGATCCA	A>G	TTGGGATTCCAGTCCCCTCCCCACA
SLC29A1	72548769	6	44295010	CTATCCGCCCCACCCCCAGCCCTGC	G>A	GGGCTTTCTGCCTGCCACACGCCGT
SLC29A1	72548770	6	44295017	CCCCACCCCCAGCCCTGCGGGGCTT	T>TT	CTGCCTGCCACACGCCGTCCCTGCT
SLC29A1	72548771	6	44295065	GCTCACTACCCCATCGGTTTCCTTC	G>C	GGAGTCTTCAAAGCCAGTGCACGTG
SLC29A1	72548772	6	44295112	CGTGCTCCCAGGTCTCAGGGAGGCG	A>G	CCCAGGGGGAGGGGCAGAGAGAAGG
SLC29A1	72548773	6	44295254	CTCCCACTGAGTCGGCTCTGGTCTC	C>A	CCGCCCCTGAGCCGCGAGGACTGGA
SLC29A2	72557996	11	65896154	GCGCCCCGGTGGGTTCCAGCTTTAG	G>C	GGTCGCAGGAGCGGCTCTGGCATCA
SLC29A2	72557995	11	65896181	ACTCCGCAGCGGCTCCCTAGTTAGG	G>T,A	GGCGCCCCGGTGGGTTCCAGCTTTA
SLC29A2	72557994	11	65896216	GCCCGGGCCCGGCTCGGGTTACGCT	C>G,C	TGGGCGGGGACTCCGCAGCGGCTCC
SLC29A2	72557993	11	65896272	CAGCGCGGCGAAGCCCGCCAGGATC	G>T	CGGGCGACCTGTGGCAGCTCTGGTT
SLC29A3	72542475	10	72748663	CGGCCTTTGGAGAGGGGTCTCTGCA	G>C	CGGCCTGGGGACAAGATGAGGGCTC
SLC29A3	72542476	10	72748713	CCTTTGAGTCCTGGGGTGCAGGTTA	T>C	AGTAGCTAAAGGGGAGGTCTGAGAC
SLC29A3	72542477	10	72748882	AAATGGGCGCACGCAGGCCCCAGCT	C>G	AGCGCCAGAAGGGGGAGCCCCGGCG
SLC29A3	72542478	10	72748946	CAAAGGAAAAAAGCGTGTTTGCAAA	C>A	GGGGAAGCGGCGGCGTGCTGCCGCG
SLC29A3	72542479	10	72748993	CGCGAGGGGCGGGGCGGGGCCGGGG	G>T	AGGAGCCCGCCTGCCGCCTGCCAAG
SLC29A3	72542480	10	72748999	GGGCGGGGCGGGGCCGGGGGAGGAG	C>A	CCGCCTGCCGCCTGCCAAGCCCAGT
SLC29A3	72542481	10	72749010	GGCCGGGGGAGGAGCCCGCCTGCCG	C>T	CTGCCAAGCCCAGTGGTCCTGGCCG
SLC31A1	60968056	9	115023481	GCGAACTCCAGCACGGTCTCTGGAC	C>T	GAAAGTAGACTGGGCTCTGGAGAAG
SLC31A1	60326103	9	115023581	CGTCAGGCCTCTCCAGCCCGCAGCG	G>T	GGCGGAGCTTCACAGCCCCTTGCAG
SLC31A1	60217350	9	115023614	CTTCACAGCCCCTTGCAGGGATTGG	T>TAGGGGGCGGG	CGGTAATGCTAGGGGGCGGGAGGGG
SLC3A2	60101666	11	62379870	AAAAGAAAATAAAAGAAAAAGACAA	A>AA	GTACAAAAGAGTAACAGCTATAAAG
SLC3A2	56686759	11	62380073	TTGTGGGTAGAGAGTTCCAGGGAAG	G>C	AGGGCGTAGACAAAGCGCCACCTGA
SLC6A12	72542485	12	192849	TACAAGCACACCCATAGCATCCACC	G>A	CCCAAAGCCAAGACAGCTTCCTCCT
SLC6A12	72542486	12	192879	AAGCCAAGACAGCTTCCTCCTGGGA	G>A	GCGCCTGGCACCCAGCTCGTCACGC
SLC6A12	72542487	12	192898	CTGGGAGGCGCCTGGCACCCAGCTC	G>A	TCACGCTCAGCCGGCAGGCAGCGGG
SLC6A12	72542488	12	193234	GAGGTTATTGCAGGTCCTGCCCCCC	G>A	CTGCAGACACGCAGTTCCACAGAGT
SLC6A14	72542489	X	115481537	ACTGAGAGACGAGGTTAGGAGGAAA	C>A	AGGGGACCCAGGAAAGGCGGCTAGA
SLC6A14	72542490	X	115481555	GAGGAAACAGGGGACCCAGGAAAGG	C>T	GGCTAGATTGCAAACGTACCTACAC
SLC6A15	72542491	12	83830828	CAGAGGAGAAGGGTAGGCTGTGGGC	G>C	GCGGCGGGGCGCGGAGGGGTAGCCA
SLC6A15	72542492	12	83830913	AAAACCCATTGATGCAGCGGCCACT	G>A	CGGCTGCCGAGCGGCGTCTTCCCAG
SLC6A15	72542493	12	83831146	GCACCATCTGAATATTCTCCAAGAG	T>C	CAGTAATGGGACTAGAAAAAATGGG
SLC6A15	72542494	12	83831169	AGTCAGTAATGGGACTAGAAAAAAT	G>C	GGTGACCCAAAGAACCCTTTTCCCT
SLC6A17	72542495	1	110494410	TCCAGGAGGGCTTTAACCATTGGGG	C>G	CCCATTCCTCTCCGAGGGCAGAAGC
SLC6A17	72542496	1	110494453	GCAGAAGCCCTGGCGAGGGCTCCAG	G>A	GTCTGCATCCCCTGACCAGGGGCCT
SLC6A17	72542497	1	110494454	CAGAAGCCCTGGCGAGGGCTCCAGG	G>A	TCTGCATCCCCTGACCAGGGGCCTC
SLC6A17	72542498	1	110494506	AGAAGCTAAGCCCCCTTGCAACTCC	C>T	TCTCCCGCCCCACGCCCACCCTCTC
SLC6A17	72542499	1	110494532	TCTCCCGCCCCACGCCCACCCTCTC	C>T	GCCTACGTCGGCCATCAGAGCCTCG
SLC6A17	72542500	1	110494576	AGCCTCGCTCGCTGCCCGAGAGCCT	C>T	GCATTGACGCCGGCCCGCGCGTGAG
SLC6A18	72544111	5	1278043	TGTCACCCTGTCCTGCCCAGCGGCC	C>T,G	GAGGGCAGCAGTGGGTGTGAGGGCA
SLC6A18	72544112	5	1278044	GTCACCCTGTCCTGCCCAGCGGCCC	G>A	AGGGCAGCAGTGGGTGTGAGGGCAG
SLC6A18	72544113	5	1278106	CCAAGAGCAGCTGAGAGGATCCCTG	C>T	GGGAATCCGGGCTTCGGGTGCATGC
SLC6A18	72544114	5	1278398	GTGGGTGCCAGGGAAGGACCCCGGC	G>A	TCAGAGCCAGGGCCTGGACCTGAGT
SLC6A18	72544115	5	1278449	TACCCATTAATGGCACTCCACTGGT	T>C	TTCCTTTAAAGAAATGAATAAATAC
SLC6A19	72544109	5	1254303	CCCGCTGAGTTCCCTCTCCCTGGAC	T>A	GGGGTGGGGGCTGGGGATGCCTGTG
SLC6A19	72544110	5	1254309	GAGTTCCCTCTCCCTGGACTGGGGT	G>C	GGGGCTGGGGATGCCTGTGCTCCAG
SLC6A19	72542501	5	1254357	CAGGGAGCTGTGGAGAGGCCCACCC	G>A	GCGTCCTGCAGGTGGGGGTGTGCGG
SLC6A19	72542502	5	1254421	CCAGACCGGGGCAGAGCCAGCATCC	T>C	GTTTGCCTTGGTTCTTTCTCCCCGG
SLC6A19	72544103	5	1254447	GTTTGCCTTGGTTCTTTCTCCCCGG	G>A	GTGCACCGGCGTTTGTGCGCATTTG
SLC6A19	72544104	5	1254466	CCCCGGGGTGCACCGGCGTTTGTGC	G>A	CATTTGTGTGTGCGTTTGTGCAGGG
SLC6A19	72544105	5	1254476	CACCGGCGTTTGTGCGCATTTGTGT	G>C	TGCGTTTGTGCAGGGGGAGGGGTGG
SLC6A19	72544106	5	1254587	GGGCCGGGCGTCTCTGCAGATAAGG	C>T	ATTAACAGTCCCTCCGCAGACGCAC
SLC6A19	72544107	5	1254602	GCAGATAAGGCATTAACAGTCCCTC	C>T	GCAGACGCACCCTGCAGATCTGCTG
SLC6A19	72544108	5	1254661	CTCCGTTCTGCCCAGGTGCCTGGGG	C>T	GAGGTGCCAAAGGTTCTCTATAAAG
SLC6A2	60681642	16	54247323	TAGCGCTAACAGGCTCCAGACGGAG	C>T	GGGCCGGGCGCTGGGTTAATGCAAT
SLC6A2	57693871	16	54247435	ACCAGTCAGCCCGCGCCCTGCCGGC	C>A	GCCCCGCGCCTCCAGCTCTTCCCCG
SLC6A2	57556520	16	54247555	GGTCGGGGGCCGGCAGGGCGCAAGG	C>T	ACCAGGGATCCCCTCGCCGCCGGAC
SLC6A3	61479999	5	1498689	GCCGCCGCTTGCTCCCAGCCATCTG	C>A	GTCCGGGAGGCGGGGGCGGGGGCGC
SLC6A4	72557983	17	25586822	CTCCGCACAGCCAGCGCCGCCGGGT	G>A	CCTCGAGGGCGCGAGGCCAGCCCGC
SLC6A4	72557982	17	25586832	GCCGGCGCCCCTCCGCACAGCCAGC	G>T	CCGCCGGGTGCCTCGAGGGCGCGAG
SLC6A4	72557981	17	25586837	GCCGCGCCGGCGCCCCTCCGCACAG	C>T	CAGCGCCGCCGGGTGCCTCGAGGGC
SLC6A4	72557980	17	25586844	AAATACGGCCGCGCCGGCGCCCCTC	C>T	GCACAGCCAGCGCCGCCGGGTGCCT
SLC6A5	72544116	11	20577270	GTGGGGCTATGCGCAGACCCTCAAC	C>T	TCTTTCGGAGTAATATTTTCGGAAT
SLC6A5	72544117	11	20577333	GGGGGGACAGCAATGGAATCTAGTG	A>G	AAGGGAAAGAATAGACAGTGATTTA
SLC6A5	72544118	11	20577496	TTCTGTCTTCCCCTCCTGCCGGTTT	C>T	GGTTTAGTAATCAGACCACATGAGT
SLC6A7	72544120	5	149549380	GGAGTAACGACACCTGTCTCTCCAG	G>A	TTGAGAAAATAGGACACCTAGTTCA
SLC6A7	72544121	5	149549460	ATACTGATAGATTGAATAATTGGAC	T>G	AATGGTGGCGTGGGCAACCCACAGT
SLC7A11	72544127	4	139382923	CTCCTCGTTCCACCACTGCTGCTGC	T>C	GCTGCTGCTGCCGCCCTATCATTAC
SLC7A11	72544128	4	139383177	GCACACACTTTAAAGAGATTTTAGC	C>G	AATCCAGAAGTAGTAAATTCGGAAC
SLC7A11	72544129	4	139383278	CAAACAAAATGAAACAGGAAATAGT	T>A	ACTTCATTTTAAGGAGTTTCTTTTT
SLC7A11	72544130	4	139383282	CAAAATGAAACAGGAAATAGTTACT	T>C	CATTTTAAGGAGTTTCTTTTTCTTT
SLC7A11	72544131	4	139383335	TGCGTGTATAAAAACATTTTACATG	C>T	GACTGTTTTGTGAGTAGAATGTATC
SLC7A5	33996472	16	86460578	GGCGGCGGGCGGCGCGCACACTGCT	C>T	GCTGGGCCGCGGCTCCCGGGTGTCC
SLC7A5	33968272	16	86460591	TGACGCAGCTGCGGGCGGCGGGCGG	C>T	GCGCACACTGCTCGCTGGGCCGCGG
SLC7A5	33961908	16	86460637	CGGGGCCGGCGGGCCGGGGCCTAAA	A>T	GGCGGCGCGGGCGGGGTTCCTGACG
SLC7A5	33971798	16	86460706	CTGGGCCGAGGGGGCGGGGCTGAGG	G>A	ACGGGGCCGGGCCACGGGGCGGGGA
SLC7A5	33944866	16	86460732	GGGCCGGACGACGCACGTGCTCCGA	G>C	CTGGGCCGAGGGGGCGGGGCTGAGG
SLC7A5	33910040	16	86460751	GGGAATAGCCCGCCAGGCTGGGCCG	G>A	ACGACGCACGTGCTCCGAGCTGGGC
SLC7A5	33988694	16	86460814	GGTCGCGAGGCCGGGGTCTCCATGG	C>A	GCAGGAGGACTGGGGCCTTCGAGGA
SLC7A5	33950621	16	86460815	AGGTCGCGAGGCCGGGGTCTCCATG	G>A	CGCAGGAGGACTGGGGCCTTCGAGG
SLC7A5	33912351	16	86460843	TGGGATGACGCGGGCGCCGGGAGGG	G>A	GGAGGTCGCGAGGCCGGGGTCTCCA
SLC7A5	33944340	16	86460857	CCGGGAGGACGGGCTGGGATGACGC	G>T	GGCGCCGGGAGGGGGGAGGTCGCGA
SLC7A5	33931987	16	86460883	GACTGCCAGGCCCCGCCCAGGCGCA	T>C	CCGGGAGGACGGGCTGGGATGACGC
SLC7A5	33929207	16	86460915	GCTGCGGGCCAGTGGGTGAAGGGGC	G>T	CGCCCTGACTGCCAGGCCCCGCCCA
SLC7A5	33961045	16	86460918	GAGGCTGCGGGCCAGTGGGTGAAGG	G>A	GCGCGCCCTGACTGCCAGGCCCCGC
SLC7A5	33986314	16	86460946	GTGCACTGCCCGCTCCCAGGCTTGA	C>G	GAGAGGCTGCGGGCCAGTGGGTGAA
SLC7A5	33966211	16	86461105	GCTGCAGGAGCTTCCCCTCAGGTCA	T>C	CCTCTCATCCCTCCCCCGTGCCCCA
SLC7A5	33962239	16	86461342	TCTTATGGCTCCCAGCGAACCCCCG	G>C	TTCTGTTGATTAAATTGAGCTCAGG
SLC7A5	33928257	16	86461451	ACCCTTTTTAGCTAAGATGCCTCTC	G>A	CATTCCCTAGGAATAACAAGCTTTA
SLC7A5	33985864	16	86461456	TCTCAACCCTTTTTAGCTAAGATGC	C>T	TCTCGCATTCCCTAGGAATAACAAG
SLC7A5	33990379	16	86461626	CCCCGGGGTGGGGTGATACTGAGGA	G>T	CTTCCTCCCTGACCCACACACACCC
SLC7A5	33959196	16	86461635	GCCAAGGAACCCCGGGGTGGGGTGA	T>C	ACTGAGGAGCTTCCTCCCTGACCCA
SLC7A5	33971919	16	86461660	CTTCCAAGGACTCGTTTGCACACAC	G>A	CCAAGGAACCCCGGGGTGGGGTGAT
SLC7A5	33988046	16	86461727	TGCGTGTTTGCCCTGGGAGGCTGAA	C>T	GCTCACCCAGAACAAAGGCCTCCCC
SLC7A5	33918135	16	86461730	GTTTGCGTGTTTGCCCTGGGAGGCT	G>T	AACGCTCACCCAGAACAAAGGCCTC
SLC7A5	33963687	16	86461894	CCTCCCTGGGGTGGGGCCTGGACAT	T>C	CCTGGCTGCAGCTAGAGGTCCCAGC
SLC7A5	33927673	16	86461965	AGAGGAATGCCCGACATACCGGGGG	G>A	CGAGCAAGGTCCAGAATGACAAGCC
SLC7A5	33968423	16	86461970	ACCGCAGAGGAATGCCCGACATACC	G>A	GGGGGCGAGCAAGGTCCAGAATGAC
SLC7A5	33975028	16	86462039	TATCTGTGTGACCTCCGCACTCCCC	C>T	GCCTGTGGCTGCCTGGGCTGCTGAG
SLC7A5	33971297	16	86462043	TTAGTATCTGTGTGACCTCCGCACT	C>G	CCCCGCCTGTGGCTGCCTGGGCTGC
SLC7A5	33933613	16	86462100	CAGATGGAGGGGTCTCTGCACCTTC	C>T	ACAGCCAGCAATGTGGACGGCAGAT
SLC7A5	33952339	16	86462167	CGGTGAGTTTGCCCAGCCATGGTGG	T>A	ACTGTCTCCTTCCCTCTGCAGGCAC
SLC7A5	33945407	16	86462192	TCTAGGGGAGGACTCAGTGAGCACT	C>T	GGTGAGTTTGCCCAGCCATGGTGGT
SLC7A5	33934622	16	86462235	AAAATGGCTCTAACTGGCACCTACC	C>T	TATTGCATAAGAAGCTGTCTAGGGG
SLC7A5	33917396	16	86462293	GCTACTTGCTGGCCGGACAAGCGAG	G>T	TAACCCTACCAAGCCTCAGCTTCCT
SLC7A5	33977213	16	86462436	ACCCTGTCATGTCCTTGGCTTATCA	T>C	GGTTGTAATTTTATGCTTTGGGGTA
SLC9A3	59934269	5	577500	TCGCCGGGTCCCAGCCCCGCGCGTC	G>A	GCCCAGCCCAGCCGGGACCCCCCGC
SLC9A3	57688213	5	577554	CGGCGGGCGGGGATCGGACTGTAGC	C>G	GGTACCGGCACCGGAGCGCGCCGGG
SLC9A3	60755978	5	577785	CACGCCCCAGGAAGGCGGCCGCGCA	G>A	TCCCGGGCTCGCTCTTGCCGCGACC
SLCO1A2	61210997	12	21379105	TAAAGAGTCACTAAAGTTATTTGAT	G>A	TACCTTTTGAAATAGAAAACCAACA
SLCO1A2	59201637	12	21379107	ACTAAAGAGTCACTAAAGTTATTTG	A>G	TGTACCTTTTGAAATAGAAAACCAA
SLCO1A2	58502637	12	21379292	TAGGGTTAGTGAAGCAGGTTTTTAG	T>C	ACAAACACAACTCAAAGTATGTGTG
SLCO1B1	60996675	12	21175147	ATTTATTGTACTCATATTTTTAAAG	A>-	AAAAAATCTTATGCCACCAACTTAA
SLCO1B1	61021104	12	21175393	CAAAAAGCCAACTACTTTAAGAGGA	A>G	TAAAGGGTGGACTTGTTGCAGTTGC
SLCO1B3	60103218	12	20854667	AAAGAAGAAAATCTTATGCAACCAA	C>A	TTAATTGAATAAGAAATAAATCATT
SLCO1B3	59312184	12	20854905	AAAAAGCCAACTAACCATTTAAAGT	G>A	AGACTTTAACATCAGAAAAAGGATG
SLCO1C1	72544132	12	20739248	AGAAATTGTAAATATGAGCAACTGA	T>C	CATGTCTCTGAGAATTAACTCTTTT
SLCO2B1	59379618	11	74539598	TTGGGGAGCTTGGGGAGACCCATCA	G>A	CATCCCCCCTGTGCCCCCACCTCTC
SLCO2B1	59886787	11	74539839	ACCCAGGGAGACAAACACTTGGAGA	T>C	ACTTGGGGCTGAGTTTGAGCAAGAC
SLCO3A1	59926948	15	90197786	GGGGGTGAGAGCAGGCGCGGCCGGC	G>A	GGCAAGGGGAACCGGGCGATGGCAG
SLCO3A1	57654412	15	90197795	AGCAGGCGCGGCCGGCGGGCAAGGG	G>A	AACCGGGCGATGGCAGCGGCGGGCG
SLCO3A1	58258078	15	90197939	GGAGGCGGGGGAGGAGGAGGAGGAA	G>T	GGGCGATCGCGGCGGCGGCGGCGGC
SLCO3A1	57907694	15	90197944	CGGGGGAGGAGGAGGAGGAAGGGGC	G>GGCG	ATCGCGGCGGCGGCGGCGGCGGCGA
SLCO3A1	58284139	15	90197948	GGAGGAGGAGGAGGAAGGGGCGATC	G>[---------]	CGGCGGCGGCGGCGGCGGCGAGGAG
Novel Polymorphisms that are in the process of being submitted to dbSNP, and are not listed in dbSNP build 130
gene	rsId	chromosome	position	preFlankingSequence	alleles	postFlankingSequence
ABCA10		17	64752737	ACAGGGCCAAAACTGATAGTCATCC	G>A	AGTTCTCTCCAAAGAATCCATTTCT
ABCA12		2	215711638	CCTGCACTGGATGCGTCACAGGGAC	T>G	AGGGGGTGGGACCTTTGCAAGGCCA
ABCA5		17	64834881	CAGCTGGGATCTGTGCGAGGGCGCG	G>GCCGCGCGCAC	CCGCGCGCACCCGCGCGCTCCTGGC
ABCA8		17	64463278	GCCACAATAATCTTGGACGTAAAAG	A>G	GAAATTGCTCCCTATAATATGATAT
ABCA8		17	64463598	ACAAATTTGACATACAAAATATTTT	T>C	TCTGAGTATAATTGAACTCCTGATT
ABCB1		7	87180786	GACGTCTTAATGAGCAGTTGAAAAA	A>-	CAAACAAAAACCTCGAAGAGTTACA
ABCB11		2	169647399	TTGTTTAAAATGGGAAACATTTAGT	A>AT	TTTTTAAAGGTGTTGGAATTCAAGT
ABCB11		2	169647588	TCCCCTTCCTGTGTCCATGTGTTCT	C>T	ATTGTTCAATTCCCACCTATGAGTG
ABCB11		2	169647650	TATCTCCTAATGCTATCCCTCCCCC	C>G	TCCCCCCACCCCACAACAGGCCCCG
ABCB11		2	169647696	CATGTTGGTGTGCTGCTCCCATTAA	C>T	ACGTCATTTAACGTTAGATATATCT
ABCB11		2	169647904	GAGAGGGTGGGAGGCTAAACTGAAA	T>C	AGTTCAAGTTCTCGCTGTTACTCTA
ABCB9		12	122017088	GGGCCTCAGGAGGAGTGGGCGGGCT	T>C	TCCTGGACGGGGCGGGGCCCCCGAG
ABCC10		6	43507059	AATGAATATGTACCCTTTATCAGTT	A>TA	TCTGCATGAAAACTTTGGATTTTCT
ABCD1		X	152643082	TCATACCGCGGCCGGAAACCGGAAG	C>T	GCCCGCCGGGCACCGCCCACCAGCC
ABCD1		X	152643355	CCCGCCGAGGGGCGAGAACGGGAGG	T>G	GGGGGTGTGGGCGGGCCCCGCCGAG
ABCD1		X	152643391	GCGGGCCCCGCCGAGGGGCGAGAAC	A>G	GGGTGGGGCTCCCGCGCCCGGACTC
ABCD2		12	38300068	AGTTAAAATGTCTATTTTTGGAGAG	G>A	TCGAATCAGGCCATCTGCTGGCGAA
ABCE1		4	146238240	TTAAACGCTCAATAAGTAATTTACT	G>T	AATGAATAAACAGATGAATAGGTTC
ABCE1		4	146238621	GCTCCACTCCTGACCCACCGGCCTT	G>A	AGGAAAGCGCAAACGTAAAAAAAGA
ABCE1		4	146238640	GGCCTTGAGGAAAGCGCAAACGTAA	A>G	AAAAGATTGAAACCGGAGAGGCGAA
ABCF2		7	150555300	TTCTCGGCGCGCCGCGCTGCCTCCT	T>C	GGAAGTGTAGTCCTCAAGTTGCAGC
ABCF2		7	150555403	GGGGCCGCGTGACGCCATCAGGATG	C>A	GCGAGGCTCGGGGAGGGGGCGGGAT
ABCF2		7	150555488	TCGGGCGCTGGAAACTGCAAATCCC	A>G	GATTGCTCGTTGGATAAACCGGCTG
ABCF2		7	150555580	TGTTGTGGAGTTACGAGTTTTTAGA	G>A	CTACCTAACCGACTCAGGCAGCAGG
CFTR		7	116907097	GCGAAGGAGGAGAGGAGGAAGGAGC	G>C	GGAGGGGTGCTGGCGGGGGTGCGTA
CFTR		7	116907102	GGAGGAGAGGAGGAAGGAGCGGGAG	G>A	GGTGCTGGCGGGGGTGCGTAGTGGG
CFTR		7	116907220	AAGGCGGGGGAAAGAGCAAAAGGAA	G>A	GGGTGGTGTGCGGAGTAGGGGTGGG
SLC22A1		6	160311138	TCCGGGGCGGATTATTCTAGTGGAT	C>G	TTGCTCTGGGAACCATGATTGTATA
SLC22A1		6	160311189	ACCCATCAGTCCCATCGAGGGCTGT	T>[--]	CACCTCGCGCAACTGCTAGCAGTCC
SLC22A1		6	160311222	CGCAACTGCTAGCAGTCCAGGGCCT	G>A	GGGAACTTCGAATTTCAGGAATTTT
SLC22A1		6	160311595	CGATAGAAACTCTTTGGAAAGGCCC	A>G	TATTTTTTATGCTCCCTTTTTTGGA
SLC22A14		3	38322110	CCTCCCACCTTGGGCCCACCTCCTG	G>A	CTACAGCCGACGATGCAGATCTTTG
SLC22A17		14	22891550	GAGAAGGGTGAAGCGGAGGAAACCG	C>T	AGAGCAAGGGCAGGGGGCAGGTGGG
SLC22A17		14	22891617	GCAGTCAGGGGCGAGGGATGCGCAG	G>A	AGGAAAATGCCAGACGCTCCGCGGG
SLC22A17		14	22891761	TGCCGCCGCCCCCGCCATTGGGCTC	G>A	GGGGTCCCGGTGGCCACCCGGGGAG
SLC29A2		11	65895841	CAGGCTGGGACCTGGGCTCCGCCCC	G>A	AGGCGGGGACAGAGGGTCGCGCCAC
SLC29A2		11	65895871	GGGGACAGAGGGTCGCGCCACCCGT	C>T	TCTCCTTCCCCCACCCGCCTCAGGG
SLC29A2		11	65895886	CGCCACCCGTCTCTCCTTCCCCCAC	C>T	CGCCTCAGGGACTCGACTCTGGCTC
SLC29A2		11	65896063	GGACGAGGTGTAACCTCACCTCCAC	C>G	CCCCGCCGAGAGCTCTGTAGGGGCA
SLC29A2		11	65896390	AGATTATGAGAGTAGGAGCAAATTA	A>G	TGATTTATAGTCTTTTCAAATTTTT
SLC47A1		17	19377298	TCTAATGGAACAACTGATGAGAGGA	G>C	AGGAGTATGCAACACCCTAACCAGC
SLC47A1		17	19377398	ACACACCCCGCGGGGTGCTAACCGA	G>A	TCACGGCTCGAGGCCTCTGGGTCCT
SLC47A1		17	19377636	GGTGCAGAGAGAGGTGCAAGGGGCG	C>A	GCCCAAGGTCGCAGGCTGCCTGGCT
SLC47A1		17	19377642	GAGAGAGGTGCAAGGGGCGCGCCCA	A>C	GGTCGCAGGCTGCCTGGCTGCGCGC
SLC47A1		17	19377733	GGCGGGCGGCCGGGGCGGGGACTGC	A>[---------]	GAGCAGGCTGCACTGCGCGGTACCC
SLC47A1		17	19377792	CCTGCGCGGTACTCACTGCCGGCCT	C>G	CGCGGTACCCACTGCCGGCCTCCGC
SLC47A1		17	19377797	GCGGTACTCACTGCCGGCCTCCGCG	G>[----------------------]	TACCCACTGCCGGCCTCCGCGCTAC
SLC47A1		17	19377800	GTACTCACTGCCGGCCTCCGCGGTA	C>T	CCACTGCCGGCCTCCGCGCTACCCG
SLC6A16		19	54520294	CGCGGCCTTTCCCGCCGATTCTCTG	C>T	GCATGCGCCGCCGCGCCCCCTCACT
SLC6A16		19	54520303	TCCCGCCGATTCTCTGCGCATGCGC	C>G	GCCGCGCCCCCTCACTCTTTCCCTA
SLC6A16		19	54520558	GTAAGGAAGAAGAGGGTAGGAAGTG	G>A	GAGAATCGTCTCATTCATTCCTTCT
SLC6A16		19	54520724	GGCTGCAGACAAGAATTAAAAACTC	A>C	AAGATTTACTTAGGTCATCCGTTCT
SLC6A2		16	54247762	AGGGGGTCGGCACGCTGCCCTCAGC	C>T	TCGGTGAGTTCAATCCCAGCCATTT
SLC6A2		16	54247766	GGTCGGCACGCTGCCCTCAGCCTCG	G>A	TGAGTTCAATCCCAGCCATTTGGGG
SLC6A2		16	54247948	CGCCCTTTTCTGGGAACCCTGCGTC	C>G	GCTCAGCGCGCGCTCATCCCAGTGT
SLC6A2		16	54248048	CGGGTAACCACCTCTTTTCCCTTTA	T>A	CCAAGCAGAGCCTCGGCGTGCCCCC
SLC6A20		3	45813100	TAACGGCGCGCCCGTCCGAGAGGCG	A>G	GGCTGGTAAATGGATGACGGCGAGC
SLC6A20		3	45813127	GCTGGTAAATGGATGACGGCGAGCC	C>T	CACCCCGCCCGATCGTCGCGGCCGG
SLC6A20		3	45813470	TGGTTCAACCTAGCCCACGTATAAG	A>G	CTGAGAGACGCGAGGAAGACACCTA
SLC7A5		16	86461758	GCTGTGAACACCCAGCTCTGCAACC	G>A	GTGTTTGCGTGTTTGCCCTGGGAGG
SLC9A3		5	577637	GGTGTCTGCGCTCGCGAGTGCGCGG	C>T	GGGGGCGGGCAGGCTCCGCCCCGGG
SLCO1B1		12	21174898	TTTGATGTAAAGAATCTATCGCATA	A>G	AGCAGTCTTAATTTTCATCATTCAG
SLCO1B1		12	21175009	ACATACCACGTTAGAACCATACTTA	T>C	GTACCAAGCAAAGAGGGTATATTTT
SLCO1B1		12	21175248	ATTAACAAAAAATAATGTGAGAATT	C>G	TGAGAAATATAATCTTTAAATATTG
SLCO1C1		12	20739363	CAATGGAAAAGAAAACCATGTAGCA	A>G	ATTAGCCCAAGAACCGTTAAAGACA
TAP1		6	32929738	TCCATCACGCACACCCTTCTCGCCT	C>A	TCCCTGCCTCCTGCCTTTCCACTTG
TAP2		6	32914531	TACGCTCGGCCAGGGCGGGCGTCAG	G>A	GCTCGGGCAGCTTTCGCTTTCGCTT
TAP2		6	32914556	GGCTCGGGCAGCTTTCGCTTTCGCT	T>TTCGCTT	CCCCAGCCAAGGCCTTCATTCTGGG
TAP2		6	32914651	CTGGAGCCCGAACTCTGGTTCGCAC	T>C	GTACAGGCCTGCAATGAGTCTCACT
Non-Novel Polymorphisms
Indels present in dbSNP-ambiguous insertion/eletion site led to multiple submissions with diferent rs numbers
gene	rsId	chromosome	position	Other rs ID	preFlankingSequence	alleles	postFlankingSequence
ABCB10	72559418	1	227761188	rs71563408	TGCCTGCACCCTCGGGCTGCGCCCG	C>CGCCCGCCCCC,CGCCCGC	CCCCGCCCCATCCTCGTCCGCGCGG
SLC22A16	72542461	6	110904691	rs71018396,rs3840531	TGCCGCCTCGGCCTCCTTCCCGGCG	C>CGC	GCTGTGGTCCCGGCGCCCGCAGTCG
ABCA1		9	106730476	rs16926146	CTGTACCCTCCACCCCCACCCCACC	C>CCACCC	ACCTCCCCCCAACTCCCTAGATGTG
ABCA10		17	64752628	rs72374615,rs56087553	TAGTTAGTTATATAAAATAATAGCT	A>[---------]	GTTATATAAGTTATATAAGTAATAT
ABCA9		17	64569088	rs72559414	ATATATATGTTATATATATATATAT	T>ATT	TTAAGTGACAAGTAAATACATACAA
SLC16A1		1	113300500	rs57948093	GGGGGCGCCGGCGCGCGCGGGCGAG	C>[--]	TAGAGGGCGCGCGCGGCTGAAAGCG
SLC22A3		6	160689416	rs57352961	CCGCGGGTCACTCCGAGGCGCGGGC	T>TGCGGGCG	GCGGGCGGCGGGCGGCGGGCGCACC
SLC6A3		5	1498731	rs58102368	CCGTGTCCGAGGCTCCGGGACGCGC	A>AAC	GGACAGTGGAGCCGTGGCCGCCGCT
SLC7A5		16	86462210	rs56358090,rs33934223	CTATTGCATAAGAAGCTGTCTAGGG	G>GG	AGGACTCAGTGAGCACTCGGTGAGT
SLC9A3		5	577512	rs58847419	CGCGCCGGGTCCTCGCCGGGTCCCA	G>[--------------------------------------]	CCCCGCGCGTCGGCCCAGCCCAGCC
SLCO1A2		12	21379340	rs56977776	AATAACTTGAAAAGAGAGCCTGGCC	A>AA	AAAAAAGATTTTTGAGCCTTGGTAG
Polymorphisms submitted that were also submitted by other groups in the same build
gene	rsId	chromosome	position	preFlankingSequence	alleles	postFlankingSequence
ABCA5	67903606	17	64835205	TCTCGCCACGCTCTTTCTGGAGGCA	C>G	GGGCAAAAACCACGGCCTCGTGTCT
ABCC2	17222667	10	101531300	AGAATCTCCCACATTCTGGATTTTG	A>G	CAATTGCATTCCAATGGAGTCCTTT
SLC10A1	56878770	14	69333664	GAACTGCACAAGAAACGGAGTCAGC	C>T	GGAGAACAAGGAGTGGTCTTCCACT
SLC15A1	58457213	13	98203143	GACCTCCTGAGTCAGCTGGCCGGGG	G>T	GTGGGGCCTGGGAATCCGCGTTTAG
SLC17A8	57691371	12	99274811	TTACTATAGCATCACCTTGGAAAGT	C>A	TCACTTGGTGAGAGCGGCAGGCGAG
SLC22A11	56722582	11	64079581	CACTCAGAAGCCCACGCTGAGATTA	A>G	ACTTTAACCAACTCAGTGAGGCAAC
SLC22A14	72542456	3	38322118	CTTGGGCCCACCTCCTGGCTACAGC	C>T	GACGATGCAGATCTTTGTTTGTTTT
SLC22A2	59695691	6	160599974	GGGCATTTGGGAAGTGCAGAAGGAC	A>G	TGCACCCCCGCTGGAGGGGTGCACC
SLC22A2	59706643	6	160600214	TGTGTTTTCTCCATAGGGCCTTGAA	G>T	AAAAGCTGGCGGTGCGCATGAGATA
SLC22A6	57677322	11	62509016	ACTGCCCATGCAAGGGTCAGGTCTC	C>T	AGCAGACCCTGAAAGCTGAGCTGCC
SLC22A6	58244957	11	62509163	CCCTCTCCCTGCTCCTATTCAGTCC	A>G	CCCTCTCCTGCCCTTTATAACCACT
SLC22A6	57350702	11	62509216	TCCAATAGATCCCACTCTGGCCCCC	C>G	CTGCCCCCAGATGCCCCCCTAATAC
SLC29A3	67346255	10	72748665	GCCTTTGGAGAGGGGTCTCTGCAGC	G>A	GCCTGGGGACAAGATGAGGGCTCCT
SLC6A12	67273841	12	192983	TCCTGGGCCCTCGGGAATGCCCCGA	G>C	GTTTCTCCTGTCCACTTCTCCTTCC
SLC6A19	67330201	5	1254758	GCCTGCTGTGTGCGGAGCCGTCCAG	C>T	GACCACCATGGTGAGGCTCGTGCTG
SLC6A2	11568322	16	54248030	CAAGTAGGGAGGAACGGCCGGGTAA	C>T	CACCTCTTTTCCCTTTATCCAAGCA
SLC7A5	33911410	16	86460881	CTGCCAGGCCCCGCCCAGGCGCATC	C>T	GGGAGGACGGGCTGGGATGACGCGG
SLC7A5	33944303	16	86461559	GCCGCTCACCAGTCTGGTCAATCTC	G>A	GGGCAGTATTTATATTCCTTCCCAT
SLC7A5	33914778	16	86461993	CTGAGATTTCGCTCGGTTTTATCAC	C>T	GCAGAGGAATGCCCGACATACCGGG
SLC7A5	33942725	16	86462040	GTATCTGTGTGACCTCCGCACTCCC	C>G	CGCCTGTGGCTGCCTGGGCTGCTGA
SLC7A5	33923136	16	86462056	GGCAGATTACAAGTTAGTATCTGTG	T>C	GACCTCCGCACTCCCCCGCCTGTGG
SLC7A5	33919688	16	86462262	CTACCAAGCCTCAGCTTCCTTATTT	G>A	CAAAATGGCTCTAACTGGCACCTAC
SLCO1A2	61364007	12	21379342	CAAATAACTTGAAAAGAGAGCCTGG	C>T	CAAAAAAAGATTTTTGAGCCTTGGT
SLCO1B1	59710386	12	21175277	GAAATATAATCTTTAAATATTGGCA	A>C	CTGGAGTGAACTCTTAAAACTAACT
SLCO2B1	58991765	11	74539631	CCTGTGCCCCCACCTCTCTGCTGCT	A>C	ACAGAGCAGGGGAAAATACCTAAGG
Polymorphisms we observed that were listed in dbSNP previously
gene	rsId	chromosome	position	preFlankingSequence	alleles	postFlankingSequence
ABCA1	1800977	9	106730271	GCCGAATCTATAAAAGGAACTAGTC	C>T	CGGCAAAAACCCCGTAATTGCGAGC
ABCA1	2740483	9	106730356	GAACTACATAAACAGAGGCCGGGAA	G>C	GGGGCGGGGAGGAGGGAGAGCACAG
ABCA1	56064613	9	106730362	GTGACTGAACTACATAAACAGAGGC	C>T	GGGAAGGGGGCGGGGAGGAGGGAGA
ABCA1	1800976	9	106730530	CCGGCGGGCCCGGGCGGGGGAAGGG	G>C	ACGCAGACCGCGGACCCTAAGACAC
ABCA1	2246298	9	106730554	CCAGCGCTTCCCGCGCGTCTTAGGC	C>T	GGCGGGCCCGGGCGGGGGAAGGGGA
ABCA12	2948981	2	215711652	GTCACAGGGACTAGGGGGTGGGACC	T>C	TTGCAAGGCCAGTAGGACTTGTCCT
ABCA13	28637820	7	48208276	CCCTTAGATCTCCTTTAAATTAATA	G>C	CAAGGTTAATAATATAATAATATGA
ABCA13	2188	7	48208357	AATTCCATTTCTGGTAGCAGGTATA	T>C	GGACTCATTTCTTCTTTGCATCTAT
ABCA13	17060	7	48208379	ATATGGACTCATTTCTTCTTTGCAT	C>T	TATTTCTAGGTTATTTGCAGCCCCG
ABCA4	11802887	1	94359432	GAGAAAGAGAACCCTAAAGACACAA	G>A	TGGCTGGGCACCAGGGAAATTGAGG
ABCA4	11806223	1	94359478	TGAGGTGGGGGATGCAATGGGAAAC	C>A	AAGACCCTCAGGCACTCTCCTCCAT
ABCA4	10747459	1	94359702	GTGATCCCTCCCTCTTTTAGTCTTT	C>T	ATCTTGCTCCGTAATGACTGAAGTC
ABCA5	28697048	17	64834963	CCCGCCTCCTGCAGAGCGCACCTGA	G>A	GGCGGGGCTCCTAGAAAGCGCCGCT
ABCA6	3744489	17	64649733	TTATTCTGCAAGGAAATGACTGTTC	C>T	GTGGTTGGTTGGGAATAAAATAAAC
ABCA8	58680324	17	64463579	TATTTTTTCTGAGTATAATTGAACT	C>T	CTGATTTAAAATTAAATCAATAACC
ABCA9	7212490	17	64568764	TTTTATACAAATTTCCCAGGAGAAT	T>C	TGGTCTCAGTTCAGCTAGCCTGCCA
ABCA9	11871944	17	64568883	GCAGGGAGTTTGTAGTTGCAGATGG	T>C	TGGCTGGACATATCAAAACATTAGG
ABCB1	3747802	7	87180522	AATAAAGTAGATTTCTTCATGTTCT	A>G	CTCTTCACAGGTAAAGAGTAATGAT
ABCB1	4148727	7	87180702	AGTAGAGATAAAATAAATTTTGAGT	A>G	CATGACTATGGCTCCAAAGCATTGA
ABCB1	28381715	7	87180835	CATGGCTTAGGGATTGGGGTATAAT	T>G	GAAAAATAGCCAGAGTTGAGAAGTT
ABCB10	4148755	1	227761489	GAGCTCTTTCTCACGCCGGCAGACC	G>A	GGCGGAGCGCGCAGACGCGACCACA
ABCB11	2241338	2	169596214	CCCTCAGAGGGTTTCCCAAGCACAC	T>C	CTGTGTTTGGGGTTATTGCTCTGAG
ABCB11	73026864	2	169647612	ACAACAGGCCCCGATGTGTGATGTT	C>T	CCCTTCCTGTGTCCATGTGTTCTCA
ABCB11	73026865	2	169647657	TTAGATATATCTCCTAATGCTATCC	C>T	TCCCCCCTCCCCCCACCCCACAACA
ABCB11	73026869	2	169647698	GCCATGTTGGTGTGCTGCTCCCATT	A>G	ACACGTCATTTAACGTTAGATATAT
ABCB4	2071646	7	86943095	GCCCGCCCAGCTCTCTCCCCAGGCT	A>G	GGCGCGGGCCAGGGGCGCAGCCTGC
ABCB4	55976025	7	86943112	CCCAGGCTAGGCGCGGGCCAGGGGC	G>C	CAGCCTGCCGCTCTTGCCGCCGGGG
ABCB4	55679062	7	86943131	AGGGGCGCAGCCTGCCGCTCTTGCC	G>A	CCGGGGCGCCCGGCTGGGGCCGCCG
ABCB4	2071645	7	86943212	GGTCGCAGGATAAGACCGAGATCAG	C>G	CTGGAGCCTCGGGTGCCGAGAAAGC
ABCB5	756885	7	20653435	ATAACCACAAGACTATGAGATAATC	A>G	AAAGTTGTTCCTTATTAGGAAAAGG
ABCB5	2893006	7	20653706	AGGTTTTCTTTAGTGTAATCCATAG	C>T	AGTTATTGCATTGGAGCAGCAGTCC
ABCB7	5981781	X	74292921	TACCTTAATTGTCTCTCCTCTTCTT	G>C	TTTTCCCAGGGCCCCAGACCGGAAA
ABCB7	5981325	X	74293145	CAATTTTACATAAACAACGAATCAT	T>C	TCTTCGTGCGTGTGTCCCAAATATT
ABCB9	61955196	12	122016971	AAGGTCGGAGCTGAGACTGGCGTGC	C>G	TTGAGACAGGCTGATGGACGGGGCG
ABCC10	73424608	6	43507095	AACTTTGGATTTTCTTTTTTTTCCT	G>A	AGACGGAGTCTTCCCCTGTCACCCA
ABCC11	66848432	16	46826642	CAACTAGAGATGCAAAGAGATGCAA	A>[----------]	GAGATGCAATGAGGGTTACTCATCA
ABCC13	2822520	21	14567931	AACAGGAAATGGAAAAGGGAGAACT	A>G	CTGAGTCAAGTGCAAACTCCCAGCC
ABCC2	1885301	10	101531043	GAGTTGTATGAGTTCCTTATAGTAT	A>G	TTGTGGATATTAACTCTTCATCAGT
ABCC2	7910642	10	101531569	AATCCCAGCCCTTTGGGAGGCCAAG	G>A	CAGAAGGATTGTTGAAGCCTGGAGT
ABCC2	2804402	10	101531573	CCAGCCCTTTGGGAGGCCAAGGCAG	A>G	AGGATTGTTGAAGCCTGGAGTTTGA
ABCC3	9895420	17	46067037	GTATTTAGAGAGACATCCCCCTGGC	T>A	TGGCCCAGGGGCCGCTCGCAGGGGC
ABCC3	4793665	17	46067086	GCTGTCGCCGTGCCAAGGGCCCCCC	C>T	ACCTCTGCCCCAAAGTCCCTCCCAG
ABCC8	36234280	11	17455337	AGGCCTGGAGTGGGCGGGTTCAGGG	T>A	CCCGAGTGTGAGTTCACCTGGGCGT
ABCD1	5986926	X	152643183	GAGCGGAGGGCCGGCGCTCCGAGCG	G>C	GAGAGGAAGAGGCGCCTCGGGCTCC
ABCD2	61933067	12	38300168	CAGAAGTTTCAGAATATACATCACT	T>C	CGGTAAGATTTCAGTAGATACCGCA
ABCD2	4072006	12	38300694	AAATAATTATTTGCTATGCCTCTAG	C>T	CATTCTCCCTTTTTCCTCTGCATCC
ABCD4	17782508	14	73839594	CCCCCATATTTTCTGGGAGACTTCC	C>T	TTTTGACAATAGGTATCCGAGAGTG
ABCD4	67772080	14	73839730	AAAGTATAAATTAGGCTTCCAGCCG	G>A	GCCCGGTGGGTTACTCCTGTAATCC
ABCE1	1455135	4	146238269	GAATAAACAGATGAATAGGTTCAGT	C>T	ATGAACTAGTTGTCACTTGCCTGCA
ABCF2	3807385	7	150555673	CGAAACAATGGGAGAGGAGAGGTGG	G>A	AGCGTGAGGGGAGGACTAAAATGAA
ABCG1	2234715	21	42511924	GGCGGGAAGGGAAGAAGCAGCAGCA	A>G	GAAAGAAGCCCCCTGGCCCTCACTC
ABCG1	57137919	21	42512087	ACCCGTGCTGGCCCAGCCCCCGCGA	G>A	TTCGGGACCCGGGGTTTCCGGGGTG
ABCG2	2231135	4	89299018	AAGTTCGTGTCAGCGCTGCCTGAGC	T>C	CGTCCCCTGGATGTCCGGGTCTCCC
ABCG2	2231134	4	89299375	ACCCAGCTAGGTCAGACGAGGTACT	G>C	ATCAGCCCAATGAGCGCCTGGTGAT
ABCG2	45604438	4	89299425	TGCGTCAGCGTCCCCGGTGCTTCGG	C>A	GCTCCGGCCAGTGACGGCGACCAAA
ABCG4	55752358	11	118524685	GGACTGGTATCGTGTGTGAAGACAG	A>T	CTGACACCTTTACAATCCCTCCACT
ABCG4	4301800	11	118524730	TCCACTTTCCCCCACCCCCAACACC	C>A	TTGCCTAATCTGTCTTCCAGGGACT
ABCG5	3806471	2	43919678	GGTCTAAGAGAGCTGCAGCCCAGGG	T>G	CACAGACCTGTGGGCCCCATGGCCG
ABCG5	11887534	2	43919751	GCTGCCGAAAGGGGCCACTCCCCAG	G>C	ATACCTCGGTGAGTGAGCAATGGGA
ABCG8	55853083	2	43919440	CTGCTCCACCTGACCCCGGAGTCCC	T>G	TGGGACAGCAGGACTGGGACTTGGC
CFTR	56223762	7	116907111	GAGGAAGGAGCGGGAGGGGTGCTGG	C>A	GGGGGTGCGTAGTGGGTGGAGAAAG
CFTR	73717525	7	116907159	AAGCCGCTAGAGCAAATTTGGGGCC	G>T	GACCAGGCAGCACTCGGCTTTTAAC
SLC12A3	13306689	16	55456436	ACTCCAGGACTCAGGGAGTGGCTGG	C>G	TTTGGGCCAGCCCAGCCCTCCAGAT
SLC12A3	4784733	16	55456507	CCACAATCAAATGGTGTTCTGCCTC	T>C	GGCCCTGTCCGGGGACCCTGCTCAC
SLC12A3	13306690	16	55456508	CACAATCAAATGGTGTTCTGCCTCT	G>C	GCCCTGTCCGGGGACCCTGCTCACC
SLC15A1	4646206	13	98202886	AGCACCTGCCAGGAGCACGTCCCGC	C>T	GGCAGGTCGCAGGAGCCCTGGGAGC
SLC15A2	10470412	3	123095744	AAAGATAATCTTTCTTAAACATAGA	T>C	TTTCTAATCAGTTCTCTAGCATTGT
SLC15A2	4603998	3	123095895	AAGCTGACACCCACAGAGTTAAACT	C>G	AGTTGCTGAAGCCACCAGCTCCCCC
SLC17A2	67844427	6	26038999	AGAGTATCTCAAAAGATGTCATCGT	G>A	TGTTTCTGCTTTGAACTGTGCATAC
SLC17A3	13198474	6	25982402	CTTAATGTCTGTGGAAGGGCTTCAA	G>A	TTGAACCCAGCGTTTCCTCCAAGCT
SLC17A3	1165201	6	25982802	AGAGTTCAGTATTTTTGTGTTTTTT	C>A	CTTTGCTATTTTTGATTTTCCCCCT
SLC17A8	12297654	12	99274549	GTGGCCTGGGTTTTGCATTTGGGCT	A>G	CTCAAATGCAAGTTCCTCGTGGGAC
SLC17A8	10860582	12	99275083	CCAGCCAGACACCCCTTGGACTCTT	T>C	TTTGGAGGGGTGGGGAGCAGAGAGA
SLC18A1	1390939	8	20084992	TCTTTGTGGACAAAGGCACACACAC	A>G	CACACATACACAGAATCCTCAGATA
SLC18A2	2619095	10	118990521	CCTGCGCAGCGACGGCGCGGGCGGG	C>A	GGAGGCCGGGGCGCCCCAGCCCCCC
SLC18A2	12412905	10	118990550	GGCCGGGGCGCCCCAGCCCCCCGCC	C>T	CCGCTCCCTCCGGCCGTGACGTCAG
SLC18A2	7898581	10	118990674	GACGGAGCCCACTGCGGTGCGGGCG	T>C	TGGCGCGGGCACGGAGGACCCGGGC
SLC19A2	2056926	1	167722059	GGCTTGCGGCGGAGCTCTCTCTAGT	G>C	AGGCGGCCAGCTGGCGTTCGTGGCA
SLC22A1	9456484	6	160311179	TGATTGTATAACCCATCAGTCCCAT	C>T	GAGGGCTGTTCACCTCGCGCAACTG
SLC22A1	8191694	6	160311475	GTTTGTGGTAGGGTTTATGGGGGGG	G>GG	TTCTTATTTTTCCCATGCATCAGAG
SLC22A1	3822848	6	160311699	GCTACCCTAAGATACATAGTTACTC	C>T	AGTAACTAGTATGATACAGAGAAAT
SLC22A1	6899549	6	160462809	CCAGCACCATAGGGTAAAAGATTAT	T>C	TCTACTTGGTTGCCTTCCAGATGTT
SLC22A11	3759053	11	64079656	CTGTAATTCAGTAACATCAAAGCAC	C>T	CTGTCTTTTTAAATAGAATCTGCCT
SLC22A12	67048806	11	64114676	CGCTGGGTTCCAGGCCAGACACTGT	G>A	ACATGAGAGGCCATAGCTGAGGTGG
SLC22A12	11602903	11	64114817	TTGATGCTGGGAAGCTCCACCGAGG	A>T	CTCAGGACAGGGTAACAGCAAAGTG
SLC22A12	524023	11	64114841	GACTCAGGACAGGGTAACAGCAAAG	T>C	GGGCACAGGACGCCAACCACAGCAG
SLC22A12	9734313	11	64114887	AGCAGGTGAGTGGAGGCAGGAGCCA	C>T	GGGTGGGGCCAGGCCACACAGCCTG
SLC22A14	10212588	3	38321965	GCTGCTGTTGCAAGGTAATATGCTG	A>G	CAGTCAGTACTGCTCACCTTCCTCC
SLC22A14	2036290	3	38322071	CCAGCCTTGGTGCCCCATCTCTGTG	G>A	CCCAGGCTTCCAGCCTCCCACCTTG
SLC22A16	11153236	6	110904514	GCGCCGAGTTAGCCGAGCTCCGGGG	G>A	CTGCGGGTAGCGCGCCCCGCCCCGA
SLC22A16	6922017	6	110904598	GTCCCAGTGCTCGGGACCAGCGCGA	C>G	GCTGTATTCTGTTCCTCCCTCCGTC
SLC22A16	68167482	6	110904639	TCCCTCCGTCGCTTGGCCCCTCGGT	C>-	CCCCCAAGTATCTTCGGCTTTTTTC
SLC22A16	11153237	6	110904712	GGCGCGCTGTGGTCCCGGCGCCCGC	A>G	GTCGCATGGTGCCCTCGCCCCCAGC
SLC22A16	3806971	6	110904738	GTCGCATGGTGCCCTCGCCCCCAGC	C>G	CCGCCGCTCTCCCACCCGCCCCGCC
SLC22A16	13205109	6	110904910	CCGGGGGCCGCAAGAATATATAGCC	T>A	TCAGCATGACGCCCCTCAGAAACAT
SLC22A18	7934793	11	2879667	ACCCTCTACAACCTCCCCTGACTTC	T>G	TCCCCTAACCCCTCACCACCATTCC
SLC22A2	55920607	6	160600025	TGTGGAGAACCAGTTATAATAAACA	C>T	GACAGGCATCCTGGGAGTGAGCTCA
SLC22A3	555754	6	160689413	GGTCCGCGGGTCACTCCGAGGCGCG	A>G	GCTGCGGGCGGCGGGCGGCGGGCGC
SLC22A4	460271	5	131657961	GGGCCGCCCTCCCCTTCCCCGCGCC	G>C	GGCCGGGGATGGGGGTGTGGTCCCA
SLC22A5	4646298	5	131733118	CCGCCCGGCGCTAGAGGAGCGAGTT	C>T	GGACTCGGACCCCAAGGCCTCGAGT
SLC22A5	2631369	5	131733165	GAGTCCCGCTGCCTTCCTAAGCCGA	G>C	CCCGGGCTACCTCGGTCGTCCCCAG
SLC22A5	2631368	5	131733196	GCTACCTCGGTCGTCCCCAGCAGGC	T>G	TGGCTGGCAGAGGCCGGGCCTCGCC
SLC22A5	4646300	5	131733330	TCGCCGGCGCCGCTCTGCCTGCCAG	C>G	GGGGCGCGCCTTGCGGCCCAGGCCC
SLC28A1	1451537	15	83228674	AGTGTGTCAGGACACCCCGGATGGG	A>G	CCTGTGACAGCAATGACACCTGCCA
SLC28A2	28524974	15	43330820	TGTTGGCCAGGGTGGTCTCGAGCGC	C>T	TGACCTCAAATGATCCGCCTGCCTC
SLC28A2	2413777	15	43330846	TGACCTCAAATGATCCGCCTGCCTC	T>C	GCCTCCCAGTGTGCTGGGATTACAA
SLC28A2	3759895	15	43331162	TGGTAAATTTTCTGGGTGCAGAGAC	G>A	GCTCTTACTGTATTTTACAGGCTAC
SLC28A2	10162724	15	43331404	GCCGAGTAACTGGAACCACAGTCGT	G>A	TGCCACCGCGCCCAGCTAATTTTTG
SLC28A2	2413776	15	43331462	TGTAGAGATGTGGTTTCGCCATGTT	A>G	TCCTGGCTGGTCTCAAGCGATCCGC
SLC28A2	2413775	15	43331580	AAAACAGTCTTAAAAACATATAATA	T>A	TTAACTTGAGAGGTGCAGTCCTCCT
SLC28A2	2899376	15	43331611	TTGAGAGGTGCAGTCCTCCTCTACA	T>G	TGAGGGCAGGCTCAGCGAAGGAGGG
SLC28A3	10868153	9	86173188	ACCTGAACAACCAGCAGCGATACCC	A>C	GGTACTGTATCAGTGTGGGGGAAAA
SLC28A3	7023720	9	86173329	AGTTGTGAGGCCCCCATTCCAGGCC	C>A	CAGCTCCCAGATGACATTTCTAGAC
SLC28A3	12378361	9	86173492	TGAGACACCAGCTGGGGTGCCCCTC	C>A	TCTAACTCCAGGCTGCACAGCCCTC
SLC28A3	11342084	9	86173579	TTCTGACATGACTTCATGTCCTAGG	G>-	CTGAACTGGGCCCAGAGACAGTGGA
SLC29A2	12281049	11	65896430	CGATACGCCCGGGGATTGCAGAGAA	T>C	CCACACCTATTCGTAGATTATGAGA
SLC29A3	7924115	10	72748868	CTTTTTCTCCTATAAAATGGGCGCA	C>G	GCAGGCCCCAGCTCAGCGCCAGAAG
SLC31A1	2233914	9	115023361	ACCGAACATTGCGTTGGCTTTCACC	G>A	GGTTGCGGGGAGGAAGCTGGGTATT
SLC47A1	2252281	17	19377779	TACCCACTGCCGGCCTGCGCGGTAC	T>C	CACTGCCGGCCTCCGCGGTACCCAC
SLC6A12	567487	12	192981	GTTCCTGGGCCCTCGGGAATGCCCC	G>C	AGGTTTCTCCTGTCCACTTCTCCTT
SLC6A12	7312189	12	192987	GGGCCCTCGGGAATGCCCCGAGGTT	T>C	CTCCTGTCCACTTCTCCTTCCACCT
SLC6A14	12720073	X	115481520	CCCAGAACAGAGACCAGACTGAGAG	A>G	CGAGGTTAGGAGGAAACAGGGGACC
SLC6A15	11831581	12	83830768	AGGGTGTGACGGAGGCGCCCACGTG	C>T	TCGGCCCGCCCGTGTTACGGCCGCC
SLC6A15	11834494	12	83830896	CCGCACCTCCCTGCCCCAAAACCCA	T>C	TGATGCAGCGGCCACTGCGGCTGCC
SLC6A16	8099837	19	54520586	GAATCGTCTCATTCATTCCTTCTAG	C>T	CTTCAAACCTTTCGCATTTACTTAA
SLC6A16	8102658	19	54520667	ATGCGTCCAACAAGGCAGACAGGGA	C>T	GTTGCCTTAAGAGAGCTCAGAAGCC
SLC6A16	8102574	19	54520709	TCAGAAGCCTACTAGGGCTGCAGAC	A>G	AGAATTAAAAACTCAAAGATTTACT
SLC6A18	9418	5	1278121	AGGATCCCTGCGGGAATCCGGGCTT	C>T	GGGTGCATGCGATCTGATCTGAGTT
SLC6A18	10061504	5	1278394	GGACGTGGGTGCCAGGGAAGGACCC	C>T	GGCGTCAGAGCCAGGGCCTGGACCT
SLC6A18	7704882	5	1278434	GGCCTGGACCTGAGTTACCCATTAA	T>C	GGCACTCCACTGGTTTTCCTTTAAA
SLC6A19	56905279	5	1254315	CCTCTCCCTGGACTGGGGTGGGGGC	T>C	GGGGATGCCTGTGCTCCAGGGAGCT
SLC6A19	36018851	5	1254458	TTCTTTCTCCCCGGGGTGCACCGGC	G>A	TTTGTGCGCATTTGTGTGTGCGTTT
SLC6A19	7379677	5	1254464	CTCCCCGGGGTGCACCGGCGTTTGT	G>A	CGCATTTGTGTGTGCGTTTGTGCAG
SLC6A19	7381010	5	1254506	TTTGTGCAGGGGGAGGGGTGGCCAG	C>T	GCCCACGGAGCAGCCTCCGGTTGCC
SLC6A2	9938924	16	54247918	CTCTGTTTCCAAATTTTTCCAGCGG	A>T	CGCGCGCCCTTTTCTGGGAACCCTG
SLC6A2	2242446	16	54247926	CCAAATTTTTCCAGCGGACGCGCGC	C>T	CTTTTCTGGGAACCCTGCGTCCGCT
SLC6A20	2271616	3	45813017	CGTCCCACCCCGGCTCGGCTTGGGG	G>T	TGGCCCCGCGCCTCCGCCGCCGACG
SLC6A20	2531743	3	45813304	ATCGAGCGCCTACTGTGTGCCAGGC	G>A	TTGTCTGGGGACACGGCTGTGAACC
SLC6A3	45611137	5	1498526	CCGCCCAGCGCTGCGGAGCGGGAGG	G>T	GAGGCTTCGCGGAACGCTCTCGGCG
SLC6A3	2975226	5	1498616	GAGCCAGGACGCGAGGGCGACCCCG	T>A	CGGCGGGAGGGCGGGGCGGGGCGGA
SLC6A3	28382213	5	1498657	GAGGCGGGGGCGGGGGCGCGGCCCG	G>C	GGAGGTGAGGAGGAGGAGCCAGGAC
SLC6A4	55753714	17	25587005	GCGGCCCCTCCCTGGCGAGCGCAAC	C>T	CCATCCAGCGGGAGCGCGGAGCCGC
SLC6A4	25533	17	25587018	CCCGCCCCGTAGCGCGGCCCCTCCC	T>C	GGCGAGCGCAACCCCATCCAGCGGG
SLC6A5	2241939	11	20577556	CACGCAGCCCCCTCCCGCTGGAGTG	A>G	CAACTGGCCAGCATACTCTAGGCTG
SLC6A7	10058507	5	149549345	CTTCCCTGTCCCTCAGCTTCCTCAT	C>T	TGTAGAATAGGAGTAACGACACCTG
SLC6A7	1860408	5	149549517	ATAAATGTTAACTGAGCACCTACTA	T>A	GTGTCAGGCTCTTTGTGCTAGATGT
SLC6A7	2058235	5	149549555	TTGTGCTAGATGTTTTCTATGCTCC	A>G	TCTTCCTGAATTGCTCACACTCCTG
SLC6A7	1860409	5	149549633	AGGTCGCACAGCAAAGACGACGCAG	G>T	GGGGTGGGCTGTTAGTGTTCCTTGC
SLC6A7	3822326	5	149549743	GCCGAGGGTTTCCGTCGCGAACCCC	C>G	CTCCCCACTCGCTCAGGGCTCTCCA
SLC7A11	4353954	4	139383089	TCCAGCATTACTCAGCTCTTTTTTT	T>A	AAAAAAAGAAAAAAACAGGAGGAGC
SLC7A5	3829509	16	86460583	CTGCGGGCGGCGGGCGGCGCGCACA	C>G	TGCTCGCTGGGCCGCGGCTCCCGGG
SLC7A5	4843724	16	86460764	ACCACGCGGGCCTGGGAATAGCCCG	C>T	CAGGCTGGGCCGGACGACGCACGTG
SLC7A5	4843725	16	86460770	TCGAGGACCACGCGGGCCTGGGAAT	A>C	GCCCGCCAGGCTGGGCCGGACGACG
SLC7A5	3829510	16	86460840	GATGACGCGGGCGCCGGGAGGGGGG	A>T	GGTCGCGAGGCCGGGGTCTCCATGG
SLC7A5	3829511	16	86460841	GGATGACGCGGGCGCCGGGAGGGGG	G>T	AGGTCGCGAGGCCGGGGTCTCCATG
SLC7A5	11861065	16	86461074	CATCCCTCCCCCGTGCCCCAGGAGC	T>A	GGTTGTGGGGGCGGTTCCATCCCCT
SLC7A5	11861981	16	86461122	CCCCAGGCTGGAAGGAGGCTGCAGG	A>G	GCTTCCCCTCAGGTCATCCTCTCAT
SLC7A5	11865074	16	86461141	CCAGCCCCACTGATGCAGCCCCCAG	G>A	CTGGAAGGAGGCTGCAGGAGCTTCC
SLC7A5	28704108	16	86461210	TTTTGGGATACAATGGGAATTACTG	G>C	GTGGCCTCGGTTCGGTTCTTCCCTC
SLC7A5	8054158	16	86461519	TTCCTTCCCATTTCCAGGCCTAGGA	G>A	CCTTGGCATCCTGCTCTCGCCTCTA
SLC7A5	4356486	16	86461632	AAGGAACCCCGGGGTGGGGTGATAC	T>C	GAGGAGCTTCCTCCCTGACCCACAC
SLC7A5	8055157	16	86461670	CTGCTGTGAGCTTCCAAGGACTCGT	T>C	TGCACACACGCCAAGGAACCCCGGG
SLC7A5	4429303	16	86461755	GTGAACACCCAGCTCTGCAACCGGT	G>C	TTTGCGTGTTTGCCCTGGGAGGCTG
SLC7A5	33916661	16	86462370	TTTCTTGTTACTCAAAGAAGAATGG	T>C	GGAATGATTAAAAGTACCATATAAG
SLC9A3	7723049	5	577772	GGCGGCCGCGCAGTCCCGGGCTCGC	T>C	CTTGCCGCGACCTCCCGGACCTCCA
SLCO1A2	3764043	12	21379271	TTAGTACAAACACAACTCAAAGTAT	G>A	TGTGTTATTAAAAGTAGCTATTTTC
SLCO1B1	73598368	12	21174787	TTAATTAAACTTCATCTCTACTCAA	G>A	AAAACTTTTAACTGAGTTAAGCTCT
SLCO1B1	11835045	12	21175086	AGGCATATTTTTTATTTGTCTTAAA	T>C	TATTTCCTATTTGGAAGTTTTAAAT
SLCO1C1	3809208	12	20739263	GAGCAACTGATCATGTCTCTGAGAA	T>C	TAACTCTTTTTGTACAGAGCGCTGC
SLCO1C1	67481714	12	20739398	AGAACCGTTAAAGACAAAACAAAAC	A>C	AACCAAAACCAAAACACACAAACAA
SLCO4C1	7710414	5	101660274	CCTGAGCCTTCAGCCCGCAGCGCGC	C>T	TCCCTTGAGCCCAAGCACTGGGAAC
SLCO4C1	10039511	5	101660366	GGTGCTGACATGAAACCTGTAAACA	G>T	TTGCATCAGGAGATTGTTCAGGAAA
SLCO4C1	34505109	5	101660405	TTGTTCAGGAAACTATCTTGCGTTT	T>TT	CTTCCTTTGCTGCTTACCAAAGCAG
TAP1	3216794	6	32929687	CGTGGAAATCAGATCTGAGAATCTC	G>-	GGAGCAGCCCTGGTGCCCAATTTTC
TAP1	2071480	6	32929837	TCTCGGGGCAGATCTGCCCTACACA	C>A	GTTAGCGCCGCGCGCAAAGCAGCCC
TAP1	56376659	6	32929846	AGATCTGCCCTACACACGTTAGCGC	C>A	GCGCGCAAAGCAGCCCCGCAGCACC
TAP1	35100697	6	32930010	ATGCTGCGGGCGGGAGCACCAACCG	G>A	GGACTTACCCCGGGCGGGAGAAGTC
TAP1	36202979	6	32930064	ACCGGGGTAATGGGTCTGGGCTTGA	G>C	GGTTGGCAGAGGGGTGGAGGAGATG
TAP2	4148869	6	32914554	AGGGCTCGGGCAGCTTTCGCTTTCG	C>T	TTCCCCAGCCAAGGCCTTCATTCTG
TAP2	4148868	6	32914562	GGCAGCTTTCGCTTTCGCTTCCCCA	G>A	CCAAGGCCTTCATTCTGGGCTGGGC
TAP2	4713598	6	32914764	AAATACAGTTGTCTCAAGGGCAACT	T>G	TATCTGTTGTCCTTGCTTTGTAATT
