# Supplementary material for: Genetic Variation in the Proximal Promoter of ABC and SLC Superfamilies: Liver and Kidney Specific Expression and Promoter Activity Predict Variation
Source: PLoS One. 2009 Sep 9;4(9):e6942. doi: 10.1371/journal.pone.0006942 (PMC2735003; doi:10.1371/journal.pone.0006942)
Supplement: Table S4 — (0.09 MB XLS) [file pone.0006942.s004.xls]

## Sheet: Sheet1
Supplemental Table 4. Promoter Haplotypes of Sequenced Region
ABCA1	Haplotype	# of Chromosomes	%of Haplotype(AA)	%of Haplotype(ME)	%of Haplotype(AS)	%of Haplotype(CA)
	CGCCGC	120	45.5224	19.3182	40	10.2941
	CGCCCC	111	11.9403	34.0909	27.1429	33.8235
	CCCCGC	78	20.8955	18.1818	15.7143	16.9118
	CCCCGT	60	14.1791	22.7273	2.85714	13.9706
	TC+CCC	23	0	0	0	16.9118
	TCCCGT	22	0	4.54545	14.2857	5.88235
	TC+CGC	7	5.22388	0	0	0
	CCCTGT	3	2.23881	0	0	0
	CGCCGT	1	0	0	0	0.735294
	CCCTGC	1	0	1.13636	0	0
	TCCCGC	1	0	0	0	0.735294
	TGCCCC	1	0	0	0	0.735294
ABCA4	Haplotype	# of Chromosomes	%of Haplotype(AA)	%of Haplotype(ME)	%of Haplotype(AS)	%of Haplotype(CA)
	CCG	501	81.0606	97.7273	99.2308	100
	TAA	15	11.3636	0	0	0
	TCG	14	7.57576	2.27273	0.769231	0
ABCA5	Haplotype	# of Chromosomes	%of Haplotype(AA)	%of Haplotype(ME)	%of Haplotype(AS)	%of Haplotype(CA)
	CGCAGGG	417	65.9091	83.8235	92.3077	73.8462
	CGCAG+G	43	12.1212	7.35294	6.92308	6.15385
	GGCAGGG	25	8.33333	0.735294	0	10
	CGCAGGA	23	12.1212	2.94118	0	2.30769
	GGCAG+G	14	0	3.67647	0	6.92308
	CACAGGG	3	0.757576	1.47059	0	0
	CGCTGGG	1	0	0	0.769231	0
	CGGAGGG	1	0	0	0	0.769231
	GGCAAGG	1	0.757576	0	0	0
ABCA6	Haplotype	# of Chromosomes	%of Haplotype(AA)	%of Haplotype(ME)	%of Haplotype(AS)	%of Haplotype(CA)
	CT	286	36.0294	70.1493	41.791	63.9706
	CC	242	55.8824	29.1045	58.209	36.0294
	TC	12	8.08824	0.746269	0	0
ABCA8	Haplotype	# of Chromosomes	%of Haplotype(AA)	%of Haplotype(ME)	%of Haplotype(AS)	%of Haplotype(CA)
	CA	316	55.1471	59.7015	70.5882	47.7941
	TA	224	43.3824	40.2985	29.4118	52.2059
	TG	2	1.47059	0	0	0
ABCA9	Haplotype	# of Chromosomes	%of Haplotype(AA)	%of Haplotype(ME)	%of Haplotype(AS)	%of Haplotype(CA)
	TT	285	63.9706	41.0448	71.9697	35.2941
	CT	221	14.7059	58.9552	28.0303	62.5
	TC	32	21.3235	0	0	2.20588
ABCA10	Haplotype	# of Chromosomes	%of Haplotype(AA)	%of Haplotype(ME)	%of Haplotype(AS)	%of Haplotype(CA)
	AA	411	95.8333	100	100	96.4286
	AG	4	4.16667	0	0	0
	[-]A	3	0	0	0	3.57143
ABCA12	Only one non-singleton SNP	# of Chromosomes
ABCA13	Haplotype	# of Chromosomes	%of Haplotype(AA)	%of Haplotype(ME)	%of Haplotype(CA)	%of Haplotype(AS)
	GTC	215	21.9697	37.5	55.1471	48.4615
	GCC	196	56.0606	40.625	29.4118	23.0769
	CCT	112	21.9697	20.3125	15.4412	27.6923
	CTC	2	0	0.78125	0	0.769231
	GCT	1	0	0.78125	0	0
ABCB1	Haplotype	# of Chromosomes	%of Haplotype(AA)	%of Haplotype(ME)	%of Haplotype(AS)	%of Haplotype(CA)
	TAA	439	93.0769	92.8571	86.9231	95.6522
	TGA	30	6.92308	5.55556	7.69231	4.34783
	GAG	9	0	1.5873	5.38462	0
ABCB4	Haplotype	# of Chromosomes	%of Haplotype(AA)	%of Haplotype(ME)	%of Haplotype(AS)	%of Haplotype(CA)
	GGGAC	211	26.5152	49.2063	36.3636	54.0984
	CGGAC	95	14.3939	17.4603	25	17.2131
	GGGGC	76	3.0303	22.2222	21.9697	12.2951
	CACAC	57	28.0303	7.14286	1.51515	7.37705
	CGCAC	48	25	3.1746	0	9.01639
	GACAC	11	0.757576	0	7.57576	0
	CGGGC	5	2.27273	0.793651	0.757576	0
	CACAA	5	0	0	3.78788	0
	GGCAC	3	0	0	2.27273	0
	GAGAC	1	0	0	0.757576	0
ABCB5	Haplotype	# of Chromosomes	%of Haplotype(AA)	%of Haplotype(ME)	%of Haplotype(AS)	%of Haplotype(CA)
	AC	432	60.4478	89.5161	97.6923	83.0882
	GT	53	35.0746	4.83871	0	0
	AT	38	4.47761	4.83871	2.30769	16.9118
	GC	1	0	0.806452	0	0
ABCB7	Haplotype	# of Chromosomes	%of Haplotype(AA)	%of Haplotype(ME)	%of Haplotype(AS)	%of Haplotype(CA)
	TGG	478	62.8788	97.7273	100	100
	CGG	34	25	0.757576	0	0
	TGC	16	10.6061	1.51515	0	0
	TAG	2	1.51515	0	0	0
ABCB8	Only Singletons observed
ABCB9	Haplotype	# of Chromosomes	%of Haplotype(AA)	%of Haplotype(ME)	%of Haplotype(AS)	%of Haplotype(CA)
	TC	272	14.3939	57.8125	74.6269	61.7188
	TG	222	65.9091	40.625	25.3731	38.2812
	CG	28	19.697	1.5625	0	0
ABCB10	Haplotype	# of Chromosomes	%of Haplotype(AA)	%of Haplotype(ME)	%of Haplotype(CA)	%of Haplotype(AS)
	GC	365	42.3077	76.5152	76.9231	82.5758
	G+	85	46.9231	18.1818	0	0
	A+	65	10.7692	0	23.0769	15.9091
	AC	9	0	5.30303	0	1.51515
ABCB11	Haplotype	# of Chromosomes	%of Haplotype(AA)	%of Haplotype(ME)	%of Haplotype(AS)	%of Haplotype(CA)
	T	488	100	96.1538	79.2308	100
	C	32	0	3.84615	20.7692	0
ABCC2	Haplotype	# of Chromosomes	%of Haplotype(AA)	%of Haplotype(ME)	%of Haplotype(CA)	%of Haplotype(PA)	%of Haplotype(AS)
	CG	427	94	85	80.5	71.4286	85
	TG	65	6	15	19.5	14.2857	15
	TA	2	0	0	0	14.2857	0
ABCC3	Haplotype	# of Chromosomes	%of Haplotype(AA)	%of Haplotype(ME)	%of Haplotype(AS)	%of Haplotype(CA)
	TT	220	53.75	53.5714	92.8571	56
	TC	77	22.5	37.5	4.08163	34
	AC	37	23.75	8.92857	3.06122	10
ABCC4	Haplotype	# of Chromosomes	%of Haplotype(AA)	%of Haplotype(ME)	%of Haplotype(AS)	%of Haplotype(CA)	%of Haplotype(PA)
	C	496	99.2424	98.3333	91.4062	97.0149	0
	T	18	0.757576	1.66667	8.59375	2.98507	0
ABCC5	Haplotype	# of Chromosomes	%of Haplotype(AA)	%of Haplotype(ME)	%of Haplotype(AS)	%of Haplotype(CA)
	GGGCCGAC	498	90.2985	92.4242	94.697	95.5882
	GGGCTGAC	10	5.97015	1.51515	0	0
	GGGCCGAT	9	0	3.0303	0	3.67647
	AGCCCGAC	5	2.23881	1.51515	0	0
	GAGCCGAC	4	0	0	3.0303	0
	GGGCCGCC	3	0	0	2.27273	0
	GGGTCGAC	3	0	1.51515	0	0.735294
	GGGCCCAC	2	1.49254	0	0	0
ABCC8	Haplotype	# of Chromosomes	%of Haplotype(AA)	%of Haplotype(ME)	%of Haplotype(AS)	%of Haplotype(CA)
	TCC	484	90.1515	96.7742	91.6667	93.9394
	ACC	25	3.78788	0.806452	8.33333	6.06061
	TCG	9	6.06061	0.806452	0	0
	TTC	2	0	1.6129	0	0
ABCC9	Haplotype	# of Chromosomes	%of Haplotype(AA)	%of Haplotype(ME)	%of Haplotype(CA)	%of Haplotype(AS)
	AT	497	95.2381	99.1803	100	100
	AC	5	3.1746	0.819672	0	0
	GT	2	1.5873	0	0	0
ABCC10	Haplotype	# of Chromosomes	%of Haplotype(AA)	%of Haplotype(ME)	%of Haplotype(AS)	%of Haplotype(CA)
	A	501	87.3134	100	100	100
	+	17	12.6866	0	0	0
ABCC11	Haplotype	# of Chromosomes	%of Haplotype(AA)	%of Haplotype(ME)	%of Haplotype(AS)	%of Haplotype(CA)
	AG	464	74.2424	87.1212	96.3235	92.3077
	[-]G	64	24.2424	12.8788	3.67647	7.69231
	AC	2	1.51515	0	0	0
ABCC12	No SNPs observed
ABCC13	Haplotype	# of Chromosomes	%of Haplotype(AA)	%of Haplotype(ME)	%of Haplotype(AS)	%of Haplotype(CA)
	AAGCC	346	68.1818	64.0625	70.8955	58.9552
	GAGAC	85	13.6364	8.59375	22.3881	19.403
	AAACC	69	14.3939	21.0938	5.97015	11.194
	ATGCC	14	0.757576	3.90625	0	5.97015
	AAGCT	7	0	1.5625	0	3.73134
	GAGCC	4	2.27273	0.78125	0	0
	AAGAC	2	0	0	0.746269	0.746269
	GAGCT	1	0.757576	0	0	0
ABCD1	Haplotype	# of Chromosomes	%of Haplotype(AA)	%of Haplotype(ME)	%of Haplotype(AS)	%of Haplotype(CA)
	CGTA	400	39.0625	87.8788	88.2812	91.6667
	CCTA	106	53.9062	12.1212	7.8125	8.33333
	TGTA	6	4.6875	0	0	0
	CCGA	5	0.78125	0	3.125	0
	CGTG	2	1.5625	0	0	0
	CGGA	1	0	0	0.78125	0
ABCD2	Haplotype	# of Chromosomes	%of Haplotype(AA)	%of Haplotype(ME)	%of Haplotype(AS)	%of Haplotype(CA)
	CGTA	400	39.0625	87.8788	88.2812	91.6667
	CCTA	106	53.9062	12.1212	7.8125	8.33333
	TGTA	6	4.6875	0	0	0
	CCGA	5	0.78125	0	3.125	0
	CGTG	2	1.5625	0	0	0
	CGGA	1	0	0	0.78125	0
ABCD3	Haplotype	# of Chromosomes	%of Haplotype(AA)	%of Haplotype(ME)	%of Haplotype(AS)	%of Haplotype(CA)
	CG	468	90.9	93.1	79.4	93
	[+]G	11	3.79	1.54	1.47	1.56
	TG	40	0	5.38	19.1	5.47
	CT	7	5.3	0	0	0
ABCD4	Haplotype	# of Chromosomes	%of Haplotype(AA)	%of Haplotype(ME)	%of Haplotype(AS)	%of Haplotype(CA)
	CCCGTTCGGG	385	78.0303	67.4242	78.6765	64.1791
	CCCATTTGGG	121	15.9091	22.7273	20.5882	31.3433
	CCCATTTGAG	10	0	3.78788	0	3.73134
	CCCGTCCGGG	9	0	5.30303	0.735294	0.746269
	CACGTTCGGG	4	3.0303	0	0	0
	TCGGATCCGG	2	0.757576	0.757576	0	0
	TCGGATCCGC	2	1.51515	0	0	0
	CCCGTTCGAG	1	0.757576	0	0	0
ABCE1	Haplotype	# of Chromosomes	%of Haplotype(AA)	%of Haplotype(ME)	%of Haplotype(AS)	%of Haplotype(CA)
	GC	456	95.1613	100	100	100
	TC	3	2.41935	0	0	0
	GT	3	2.41935	0	0	0
ABCF2	Haplotype	# of Chromosomes	%of Haplotype(AA)	%of Haplotype(ME)	%of Haplotype(AS)	%of Haplotype(CA)
	GG	490	94.697	90.9091	86.5672	96.2687
	AG	39	5.30303	9.09091	11.194	3.73134
	GA	3	0	0	2.23881	0
ABCF3	Haplotype	# of Chromosomes	%of Haplotype(AA)	%of Haplotype(ME)	%of Haplotype(AS)	%of Haplotype(CA)	*Only core promoter SNPs
	CC	517	94.6154	99.2424	96.3235	100
	GC	8	5.38462	0.757576	0	0
	CT	5	0	0	3.67647	0
ABCG1	Haplotype	# of Chromosomes	%of Haplotype(AA)	%of Haplotype(ME)	%of Haplotype(AS)	%of Haplotype(CA)
	ACGC	327	86.9231	58.1967	50.7576	64.4068
	ACAC	117	10	28.6885	34.8485	19.4915
	GCGC	42	0	9.83607	14.3939	9.32203
	ACGA	9	0.769231	3.27869	0	3.38983
	GCGA	4	0	0	0	3.38983
	ATGC	2	1.53846	0	0	0
	GTGC	1	0.769231	0	0	0
ABCG2	Haplotype	# of Chromosomes	%of Haplotype(AA)	%of Haplotype(ME)	%of Haplotype(AS)	%of Haplotype(CA)
	TCGAT	427	85.2459	92.2414	100	89.5833
	TCCAT	16	2.45902	6.03448	0	6.25
	TAGAT	11	7.37705	1.72414	0	0
	ACGAT	5	4.09836	0	0	0
	TCG-C	4	0	0	0	4.16667
	TCG-T	1	0.819672	0	0	0
ABCG4	Haplotype	# of Chromosomes	%of Haplotype(AA)	%of Haplotype(ME)	%of Haplotype(AS)	%of Haplotype(CA)
	ACCG	347	81.8182	92.1875	13.5593	78.3582
	AACG	133	12.1212	4.6875	72.8814	18.6567
	TACG	24	4.54545	3.125	8.47458	2.98507
	TACA	6	0	0	5.08475	0
	AA+G	2	1.51515	0	0	0
ABCG5	Haplotype	# of Chromosomes	%of Haplotype(AA)	%of Haplotype(ME)	%of Haplotype(AS)	%of Haplotype(CA)
	CGCATCT	237	52.2727	53.0769	13.9706	60.6061
	CGCAGCT	230	25.7576	30	83.8235	32.5758
	CCCATCT	40	6.06061	15.3846	2.20588	6.81818
	CGCCGCT	15	11.3636	0	0	0
	CGCAGCG	3	0.757576	1.53846	0	0
	AGCATCT	2	1.51515	0	0	0
	CGAATCT	2	1.51515	0	0	0
	CGAATGT	1	0.757576	0	0	0
ABCG8	Haplotype	# of Chromosomes	%of Haplotype(AA)	%of Haplotype(ME)	%of Haplotype(AS)	%of Haplotype(CA)
	CGTC	520	95.3125	98.4848	98.5294	100
	AGTC	4	3.125	0	0	0
	CGGC	3	0.78125	1.51515	0	0
	CATC	2	0	0	1.47059	0
	CGTG	1	0.78125	0	0	0
CFTR	Haplotype	# of Chromosomes	%of Haplotype(AA)	%of Haplotype(ME)	%of Haplotype(AS)	%of Haplotype(CA)
	GG	529	96.2121	100	100	100
	GT	3	2.27273	0	0	0
	CG	2	1.51515	0	0	0
SLC3A2	only singletons observed
SLC6A2	Haplotype	# of Chromosomes	%of Haplotype(AA)	%of Haplotype(ME)	%of Haplotype(CA)	%of Haplotype(AS)
	AT	376	77.3438	76.1538	75	66.4062
	AC	130	19.5312	23.8462	25	33.5938
	TT	4	3.125	0	0	0
SLC6A3	Haplotype	# of Chromosomes	%of Haplotype(AA)	%of Haplotype(ME)	%of Haplotype(AS)	%of Haplotype(CA)
	GT	273	64.0351	56	77.4194	35.8209
	GA	196	33.3333	44	22.5806	64.1791
	CA	3	2.63158	0	0	0
SLC6A4	Haplotype	# of Chromosomes	%of Haplotype(AA)	%of Haplotype(ME)	%of Haplotype(AS)	%of Haplotype(CA)
	TC	377	90	93.75	97.2973	90.678
	CC	28	10	6.25	2.7027	6.77966
	TT	3	0	0	0	2.54237
SLC6A5	Haplotype	# of Chromosomes	%of Haplotype(AA)	%of Haplotype(ME)	%of Haplotype(AS)	%of Haplotype(CA)
	CACCT	409	73.0769	79.5455	72.7273	85.6061
	TACCT	59	1.53846	15.1515	25	3.0303
	CACCG	42	15.3846	5.30303	0	11.3636
	CATTT	10	7.69231	0	0	0
	CGCCT	3	0	0	2.27273	0
	CATCT	3	2.30769	0	0	0
SLC6A7	Haplotype	# of Chromosomes	%of Haplotype(AA)	%of Haplotype(ME)	%of Haplotype(CA)	%of Haplotype(AS)
	CGAAGC	243	65.1515	29.2308	40.7692	53.2258
	CGTAGC	224	25	62.3077	50.7692	35.4839
	CGAATC	21	3.78788	1.53846	1.53846	9.67742
	TGAAGC	18	5.30303	3.07692	5.38462	0
	TAAAGC	4	0.757576	0.769231	1.53846	0
	CGAGGC	4	0	3.07692	0	0
	CGTAGG	2	0	0	0	1.6129
SLC6A12	Haplotype	# of Chromosomes	%of Haplotype(AA)	%of Haplotype(ME)	%of Haplotype(AS)	%of Haplotype(CA)
	TGGGGG	442	67.6923	83.0769	99.2188	88.806
	CGGGGG	44	23.0769	5.38462	0.78125	4.47761
	TGGAGG	12	0	4.61538	0	4.47761
	TGCGGG	10	6.92308	0.769231	0	0
	TCGGGG	8	0	3.84615	0	2.23881
	TGGGGA	3	0	2.30769	0	0
	TGGGAG	2	1.53846	0	0	0
	CGGAGG	1	0.769231	0	0	0
SLC6A14	Haplotype	# of Chromosomes	%of Haplotype(AA)	%of Haplotype(ME)	%of Haplotype(CA)	%of Haplotype(AS)
	AC	467	69.697	92.4242	92.9688	98.5294
	GC	58	28.0303	7.57576	7.03125	1.47059
	GA	3	2.27273	0	0	0
SLC6A15	Haplotype	# of Chromosomes	%of Haplotype(AA)	%of Haplotype(ME)	%of Haplotype(AS)	%of Haplotype(CA)
	TTC	489	79.2308	100	100	100
	CCT	21	16.1538	0	0	0
	TCC	6	4.61538	0	0	0
SLC6A16	Haplotype	# of Chromosomes	%of Haplotype(AA)	%of Haplotype(ME)	%of Haplotype(CA)	%of Haplotype(AS)
	AACC	366	53.8462	80.303	77.6119	65.1515
	AGTC	97	27.6923	14.3939	16.4179	15.1515
	AGTT	52	11.5385	3.0303	5.22388	19.697
	CACC	12	6.15385	2.27273	0.746269	0
	AGCC	1	0.769231	0	0	0
SLC6A17	Haplotype	# of Chromosomes	%of Haplotype(AA)	%of Haplotype(ME)	%of Haplotype(AS)	%of Haplotype(CA)
	CC	510	93.0769	99.2308	100	100
	CT	7	4.61538	0.769231	0	0
	GC	3	2.30769	0	0	0
SLC6A18	Haplotype	# of Chromosomes	%of Haplotype(AA)	%of Haplotype(ME)	%of Haplotype(AS)	%of Haplotype(CA)	*Only core promoter SNPs
	TGTT	201	45.9677	46.9697	22.5806	40.2985
	CGTT	148	30.6452	19.697	38.7097	26.8657
	TGCT	71	4.83871	7.57576	37.9032	5.97015
	CGCT	67	14.5161	15.1515	0.806452	20.8955
	CGTC	24	1.6129	10.6061	0	5.97015
	TATT	3	2.41935	0	0	0
SLC6A19	Haplotype	# of Chromosomes	%of Haplotype(AA)	%of Haplotype(ME)	%of Haplotype(AS)	%of Haplotype(CA)
	TTGGCCC	178	15.873	36.3636	34.0909	48.5075
	TCGGCCC	107	27.7778	39.3939	5.30303	9.70149
	TTGGTCC	102	2.38095	12.1212	34.8485	27.6119
	TCGACCC	100	34.127	7.57576	25.7576	9.70149
	TCGGCCT	21	16.6667	0	0	0
	TCAGCCC	10	0	3.0303	0	4.47761
	ACGGCCC	3	2.38095	0	0	0
	TTGGCTC	2	0	1.51515	0	0
	TTGGCCT	1	0.793651	0	0	0
SLC6A20	Haplotype	# of Chromosomes	%of Haplotype(AA)	%of Haplotype(ME)	%of Haplotype(AS)	%of Haplotype(CA)
	GG	112	53.9	30.2	30	30.8
	AG	90	25	38.4	28.6	23.1
	GT	67	14.5	19.8	30	23.1
	AT	41	6.58	11.6	11.4	23.1
SLC7A5	Haplotype	# of Chromosomes	%of Haplotype(AA)	%of Haplotype(ME)	%of Haplotype(CA)	%of Haplotype(PA)	%of Haplotype(AS)	*Only core promoter SNPs
	GAGCACGGGACC	350	46.2025	62	66.25	83.3333	82.5
	TTGCCCGGGAGC	60	6.96203	9	11.875	16.6667	15.8333
	GAGCCTGGGACC	38	15.8228	5	5	0	0
	GAGCCTGGGACT	28	1.26582	18	5	0	0
	GAAAACGGGACC	23	13.2911	2	0	0	0
	TTGCCTGGGAGC	22	5.6962	2	6.875	0	0
	GAAAACGGGAGC	8	5.06329	0	0	0	0
	TTGCCCGGGACC	6	3.16456	1	0	0	0
	TTGCCCAGGAGC	5	0	0	3.125	0	0
	TTGCACGGGAGC	2	0	0	1.25	0	0
	GAGCACGGGAGC	2	1.26582	0	0	0	0
	TTAACTGGGAGC	1	0	0	0.625	0	0
	GAGCACGGGTCC	1	0	0	0	0	0.833333
	TTGCACGGGACC	1	0	1	0	0	0
	GAGCACGCGACC	1	0	0	0	0	0.833333
	TTGCCTGGAACC	1	0.632911	0	0	0	0
	GAAAACGGAACC	1	0.632911	0	0	0	0
SLC7A11	Haplotype	# of Chromosomes	%of Haplotype(AA)	%of Haplotype(ME)	%of Haplotype(AS)	%of Haplotype(CA)
	CT	457	86.9231	87.5	86.0294	81.8182
	CA	70	11.5385	11.7647	13.2353	15.9091
	TT	7	1.53846	0.735294	0.735294	2.27273
SLC9A3	Haplotype	# of Chromosomes	%of Haplotype(AA)	%of Haplotype(ME)	%of Haplotype(AS)	%of Haplotype(CA)
	GTCG	330	64.0351	70.6349	56.3492	73.4848
	GTGG	85	9.64912	11.1111	40.4762	6.81818
	GCCG	76	21.9298	18.254	1.5873	19.697
	GTCA	5	4.38596	0	0	0
	ATCG	2	0	0	1.5873	0
SLC10A1	Haplotype	# of Chromosomes	%of Haplotype(AA)	%of Haplotype(ME)	%of Haplotype(AS)	%of Haplotype(CA)
	C	504	92.9688	99.2063	100	100
	T	10	7.03125	0.793651	0	0
SLC12A3	Haplotype	# of Chromosomes	%of Haplotype(AA)	%of Haplotype(ME)	%of Haplotype(AS)	%of Haplotype(CA)
	CTG	322	63.3333	56.8182	61.5385	68.9394
	CCG	104	21.6667	25.7576	14.6154	18.9394
	CCC	67	15	13.6364	11.5385	12.1212
	GTG	20	0	3.78788	11.5385	0
	GCC	1	0	0	0.769231	0
SLC13A1	Haplotype	# of Chromosomes	%of Haplotype(CA)	%of Haplotype(AA)	%of Haplotype(ME)	%of Haplotype(AS)	%of Haplotype(PA)
	GCGG	538	98.75	93.6709	100	100	100
	TCGG	5	0	3.16456	0	0	0
	GCGT	3	0	1.89873	0	0	0
	GCTG	2	0	1.26582	0	0	0
	GTGG	2	1.25	0	0	0	0
SLC15A1	Haplotype	# of Chromosomes	%of Haplotype(AA)	%of Haplotype(ME)	%of Haplotype(AS)	%of Haplotype(CA)	%of Haplotype(PA)
	GCTC	358	91.129	100	95.6522	98.1481	0
	TTCC	11	8.87097	0	0	0	0
	GCTT	5	0	0	4.34783	1.85185	0
SLC15A2	Haplotype	# of Chromosomes	%of Haplotype(AA)	%of Haplotype(ME)	%of Haplotype(AS)	%of Haplotype(CA)
	TCC	485	93.0769	91.6667	93.2836	88.0597
	CGC	33	6.92308	1.51515	5.22388	11.194
	CCC	9	0	6.81818	0	0
	TCT	2	0	0	1.49254	0
	TGC	1	0	0	0	0.746269
SLC16A1	Haplotype	# of Chromosomes	%of Haplotype(AA)	%of Haplotype(ME)	%of Haplotype(AS)	%of Haplotype(CA)
	CCC	486	88.9	98.4	90.6	100
	C[+]X	13	8.73	1.56	0	0
	CCG	3	2.38	0	0	0
	GCC	12	0	0	9.38	0
SLC17A1	Haplotype	# of Chromosomes	%of Haplotype(AA)	%of Haplotype(ME)	%of Haplotype(AS)	%of Haplotype(CA)
	TGA	255	69.8413	44.0299	27.2059	63.3929
	TAA	220	23.8095	49.2537	71.3235	24.1071
	TGG	31	4.7619	6.71642	1.47059	12.5
	[-]GA	2	1.5873	0	0	0
SLC17A2	Haplotype	# of Chromosomes	%of Haplotype(AA)	%of Haplotype(ME)	%of Haplotype(AS)	%of Haplotype(CA)
	G	489	93.1818	94.0299	97.0588	85.7143
	A	39	6.81818	5.97015	2.94118	14.2857
SLC17A3	Haplotype	# of Chromosomes	%of Haplotype(AA)	%of Haplotype(ME)	%of Haplotype(AS)	%of Haplotype(CA)	*Only core promoter SNPs
	GG	524	99.2424	98.5294	100	91.791
	GA	12	0.757576	1.47059	0	6.71642
	AG	2	0	0	0	1.49254
SLC17A4	Only 1 SNP observed
SLC17A6	Haplotype	# of Chromosomes	%of Haplotype(AA)	%of Haplotype(ME)	%of Haplotype(AS)	%of Haplotype(CA)
	ATG	514	93.9394	96.9697	100	92.6471
	ATA	15	0.757576	3.0303	0	7.35294
	TTG	4	3.0303	0	0	0
	ACG	3	2.27273	0	0	0
SLC17A8	Haplotype	# of Chromosomes	%of Haplotype(AA)	%of Haplotype(ME)	%of Haplotype(AS)	%of Haplotype(CA)
	ATG	436	86.3636	84.9206	98.3607	77.8689
	ACG	57	6.81818	15.0794	1.63934	22.1311
	GCG	7	5.30303	0	0	0
	ACA	2	1.51515	0	0	0
SLC18A1	Haplotype	# of Chromosomes	%of Haplotype(AA)	%of Haplotype(ME)	%of Haplotype(AS)	%of Haplotype(CA)
	GA	367	79.1045	65.625	85.6061	47.7612
	GG	159	19.403	34.375	14.3939	52.2388
	TA	2	1.49254	0	0	0
SLC18A2	Haplotype	# of Chromosomes	%of Haplotype(AA)	%of Haplotype(ME)	%of Haplotype(AS)	%of Haplotype(CA)
	ACGT	232	29.2308	62.1212	14.1791	68.3824
	CCAT	134	3.07692	12.1212	60.4478	24.2647
	CCGT	97	54.6154	8.33333	10.4478	0.735294
	CTGT	59	7.69231	17.4242	13.4328	5.88235
	CCGC	7	5.38462	0	0	0
	ATGT	2	0	0	1.49254	0
	ACAT	1	0	0	0	0.735294
SLC19A1	Haplotype	# of Chromosomes	%of Haplotype(AA)	%of Haplotype(ME)	%of Haplotype(AS)	%of Haplotype(CA)	*Only core promoter SNPs
	ACGT	232	29.2308	62.1212	14.1791	68.3824
	CCAT	134	3.07692	12.1212	60.4478	24.2647
	CCGT	97	54.6154	8.33333	10.4478	0.735294
	CTGT	59	7.69231	17.4242	13.4328	5.88235
	CCGC	7	5.38462	0	0	0
	ATGT	2	0	0	1.49254	0
	ACAT	1	0	0	0	0.735294
SLC19A2	Haplotype	# of Chromosomes	%of Haplotype(AA)	%of Haplotype(ME)	%of Haplotype(AS)	%of Haplotype(CA)
	CGG	274	51.5385	67.9104	12.5	73.8806
	CCG	255	46.9231	31.3433	87.5	24.6269
	TGG	3	1.53846	0.746269	0	0
	CGT	2	0	0	0	1.49254
SLC22A1	Haplotype	# of Chromosomes	%of Haplotype(AA)	%of Haplotype(ME)	%of Haplotype(AS)	%of Haplotype(CA)
	T	527	94.7761	100	100	100
	C	7	5.22388	0	0	0
SLC22A2	Haplotype	# of Chromosomes	%of Haplotype(AA)	%of Haplotype(ME)	%of Haplotype(AS)	%of Haplotype(CA)
	GCA	511	94.4444	99.2424	100	99.2537
	ATA	6	3.96825	0	0	0.746269
	GTG	2	1.5873	0	0	0
	ACA	1	0	0.757576	0	0
SLC22A3	Haplotype	# of Chromosomes	%of Haplotype(AA)	%of Haplotype(ME)	%of Haplotype(AS)	%of Haplotype(CA)	%of Haplotype(PA)	*Only core promoter SNPs
	CCGGT	282	44.6154	61.5385	59.2308	50	0
	CCGAT	208	40	36.9231	32.3077	49.2537	0
	CC-AT	18	11.5385	1.53846	0	0.746269	0
	CCGG+	10	0	0	7.69231	0	0
	GCGAT	3	2.30769	0	0	0	0
	CGGAT	2	1.53846	0	0	0	0
	GCGGT	1	0	0	0.769231	0	0
SLC22A4	Haplotype	# of Chromosomes	%of Haplotype(AA)	%of Haplotype(ME)	%of Haplotype(AS)	%of Haplotype(CA)		*Only core promoter SNPs
	CG	390	86.7647	69.403	66.1765	65.4412
	CC	149	13.2353	30.597	32.3529	33.8235
	GG	2	0	0	1.47059	0
	TG	1	0	0	0	0.735294
SLC22A5	Haplotype	# of Chromosomes	%of Haplotype(AA)	%of Haplotype(ME)	%of Haplotype(AS)	%of Haplotype(CA)
	CGTCCGGG	166	29.4118	38.1818	53.125	12.1212
	CCGCCGGG	165	31.6176	28.1818	34.375	35.6061
	CGTCCCGG	150	38.2353	31.8182	0	47.7273
	CCGCGGGG	13	0	0.909091	9.375	0
	TGTCCGGT	4	0	0	3.125	0
	CGTCCCAG	3	0	0	0	2.27273
	CGTACGGG	3	0	0	0	2.27273
	CGGCCGGG	1	0.735294	0	0	0
	CCTCCGGG	1	0	0.909091	0	0
SLC22A6	Haplotype	# of Chromosomes	%of Haplotype(AA)	%of Haplotype(ME)	%of Haplotype(CA)	%of Haplotype(AS)
	CA	505	98.5075	95.2381	91.4062	100
	GG	18	1.49254	3.96825	8.59375	0
	CG	1	0	0.793651	0	0
SLC22A7	Haplotype	# of Chromosomes	%of Haplotype(AA)	%of Haplotype(ME)	%of Haplotype(AS)	%of Haplotype(CA)
	C	504	100	100	100	100
SLC22A8	Only 1 non-singleton SNP observed
SLC22A9	Only 1 non-singleton SNP observed in each population
SLC22A10	Haplotype	# of Chromosomes	%of Haplotype(AA)	%of Haplotype(ME)	%of Haplotype(AS)	%of Haplotype(CA)
	GT	514	94.8529	96.2687	100	93.8462
	GC	12	0.735294	2.98507	0	5.38462
	AT	8	4.41176	0.746269	0	0.769231
SLC22A11	Haplotype	# of Chromosomes	%of Haplotype(AA)	%of Haplotype(ME)	%of Haplotype(AS)	%of Haplotype(CA)
	GAC	420	71.6418	87.7358	96.0938	84.375
	GAT	37	5.97015	9.43396	0	14.8438
	CAC	24	12.6866	1.88679	3.90625	0
	GGC	8	5.22388	0	0	0.78125
	CAT	6	4.47761	0	0	0
	CGC	1	0	0.943396	0	0
SLC22A12	Haplotype	# of Chromosomes	%of Haplotype(AA)	%of Haplotype(ME)	%of Haplotype(AS)	%of Haplotype(CA)
	GATC	275	66.9355	43.2203	79.1667	35.9375
	GTCT	190	20.1613	52.5424	20.8333	60.9375
	GACC	15	12.0968	0	0	0
	ATCT	9	0.806452	4.23729	0	2.34375
	GTTC	1	0	0	0	0.78125
SLC22A13	Haplotype	# of Chromosomes	%of Haplotype(AA)	%of Haplotype(ME)	%of Haplotype(AS)	%of Haplotype(CA)
	CCG	517	96.9231	100	98.4848	97.7273
	CTG	4	3.07692	0	0	0
	CCA	3	0	0	0	2.27273
	TCG	2	0	0	1.51515	0
SLC22A14	Haplotype	# of Chromosomes	%of Haplotype(AA)	%of Haplotype(ME)	%of Haplotype(AS)	%of Haplotype(CA)
	G	453	91.791	93.9655	80.7692	93.5484
	A	51	8.20896	6.03448	19.2308	6.45161
SLC22A16	Haplotype	# of Chromosomes	%of Haplotype(AA)	%of Haplotype(ME)	%of Haplotype(AS)	%of Haplotype(CA)	*Only core promoter SNPs
	CACACCCGG	387	49.2308	87.1212	71.2121	86.3636
	GG+T-GCGG	66	10	6.81818	22.7273	10.6061
	GG+A-GCGG	23	16.9231	0	0.757576	0
	GG+A-GCGA	20	4.61538	4.54545	4.54545	1.51515
	GGCA-GCTG	16	10.7692	0.757576	0	0.757576
	CACACCTGG	4	3.07692	0	0	0
	GACACCCGG	4	3.07692	0	0	0
	CACACGCGG	2	1.53846	0	0	0
	CACACCCTG	1	0.769231	0	0	0
	GGCACGCGG	1	0	0	0.757576	0
	GG+A-GCAG	1	0	0.757576	0	0
	CACACCCAG	1	0	0	0	0.757576
SLC22A17	Haplotype	# of Chromosomes	%of Haplotype(AA)	%of Haplotype(ME)	%of Haplotype(AS)	%of Haplotype(CA)
	G	499	95.8333	97.6923	93.2836	98.5075
	A	19	4.16667	2.30769	6.71642	1.49254
SLC22A18	Haplotype	# of Chromosomes	%of Haplotype(AA)	%of Haplotype(ME)	%of Haplotype(AS)	%of Haplotype(CA)
	TG	323	51.5152	60.6061	85.0746	45.5224
	GG	205	45.4545	39.3939	14.9254	54.4776
	GC	4	3.0303	0	0	0
SLC28A1	Haplotype	# of Chromosomes	%of Haplotype(AA)	%of Haplotype(ME)	%of Haplotype(AS)	%of Haplotype(CA)
	CAG	458	86.3636	90.625	74.2424	97.0149
	CAA	42	6.06061	4.6875	20.4545	0.746269
	CGG	24	7.57576	3.125	5.30303	2.23881
	TAG	2	0	1.5625	0	0
SLC28A2	Haplotype	# of Chromosomes	%of Haplotype(AA)	%of Haplotype(ME)	%of Haplotype(CA)	%of Haplotype(PA)	%of Haplotype(AS)
	TCAGGAGA	252	39.3939	40	72.5	35.7143	26.6667
	CCGGATGA	140	18.1818	55	26.5	50	55
	CTGGATGA	33	16.1616	5	0	0	0
	CCAAGAGA	23	11.6162	0	0	0	0
	CTGGATTA	18	3.0303	0	1	0	16.6667
	TCAAGAGA	5	2.52525	0	0	0	0
	CCAGGAGA	5	2.52525	0	0	0	0
	CTGGATGT	3	1.51515	0	0	0	0
	TTAGGAGA	2	1.0101	0	0	0	0
	TCGGGAGA	2	1.0101	0	0	0	0
	TCGGAAGA	2	1.0101	0	0	0	0
	TTGGGATA	1	0	0	0	7.14286	0
	TCGGATGA	1	0.505051	0	0	0	0
	TCAGGAGT	1	0.505051	0	0	0	0
	TCAGAAGA	1	0.505051	0	0	0	0
	CTGGAAGA	1	0.505051	0	0	0	0
	CCGGATTA	1	0	0	0	0	1.66667
	CCGGAAGA	1	0	0	0	7.14286	0
SLC28A3	Haplotype	# of Chromosomes	%of Haplotype(AA)	%of Haplotype(ME)	%of Haplotype(AS)	%of Haplotype(CA)	*Only core promoter SNPs
	CCA	278	52.2222	100	90.1961	97.2727
	CAC	39	28.8889	0	9.80392	2.72727
	CCC	13	14.4444	0	0	0
	GCA	4	4.44444	0	0	0
SLC29A1	Only 1 non-singleton SNP observed in each population
SLC29A2	Haplotype	# of Chromosomes	%of Haplotype(AA)	%of Haplotype(ME)	%of Haplotype(AS)	%of Haplotype(CA)	*Only core promoter SNPs
	CCG	529	88.9706	100	100	100
	TCG	13	9.55882	0	0	0
	CTA	2	1.47059	0	0	0
SLC29A3	Haplotype	# of Chromosomes	%of Haplotype(AA)	%of Haplotype(ME)	%of Haplotype(AS)	%of Haplotype(CA)
	GTCCGCGG	185	11.5385	50	49.2188	38.8889
	GTGCGCAG	153	46.1538	23.0769	33.5938	18.5185
	GTGCGTAG	65	19.2308	12.3077	0	22.2222
	GTGCGCGG	40	14.6154	6.92308	6.25	3.7037
	GTGGGCAG	16	0	1.53846	10.1562	0.925926
	ATCCGCGG	15	2.30769	2.30769	0	8.33333
	GTGCTCGG	8	4.61538	1.53846	0	0
	GTCCGCAG	5	0	0.769231	0	3.7037
	GCGCGTAG	4	0	0	0	3.7037
	GTGCGCAT	3	0.769231	1.53846	0	0
	GTGGTCGG	1	0.769231	0	0	0
	GTCGGCAG	1	0	0	0.78125	0
SLC31A1	Haplotype	# of Chromosomes	%of Haplotype(AA)	%of Haplotype(ME)	%of Haplotype(CA)	%of Haplotype(AS)	*Only core promoter SNPs
	GT	522	100	98.4375	97.7941	97.7612
	G+	5	0	1.5625	2.20588	0
	TT	3	0	0	0	2.23881
SLC47A1	Haplotype	# of Chromosomes	%of Haplotype(AA)	%of Haplotype(ME)	%of Haplotype(AS)	%of Haplotype(CA)	*Only core promoter SNPs
	CACCGC	319	76.4706	49.2647	44.1176	64.7059
	CATCGC	206	19.8529	47.0588	53.6765	30.8824
	CACGGC	14	1.47059	2.94118	1.47059	4.41176
	AACCGC	3	2.20588	0	0	0
	CATGGC	2	0	0.735294	0.735294	0
SLCO1A2	Haplotype	# of Chromosomes	%of Haplotype(AA)	%of Haplotype(ME)	%of Haplotype(AS)	%of Haplotype(CA)	*Only core promoter SNPs
	CATG	462	93.2836	79.2308	80	95.5882
	CATA	35	0	6.92308	20	0
	T+TG	17	2.23881	9.23077	0	1.47059
	CACG	12	4.47761	1.53846	0	2.94118
	CACA	3	0	2.30769	0	0
	C+TG	1	0	0.769231	0	0
SLCO1B1	Haplotype	# of Chromosomes	%of Haplotype(AA)	%of Haplotype(ME)	%of Haplotype(AS)	%of Haplotype(CA)
	GTAAGC	460	69.1176	95.5882	86.7647	86.7647
	GCAAGC	42	26.4706	1.47059	1.47059	1.47059
	GTCAGC	18	0	1.47059	0	11.7647
	GTAACC	12	0	0	8.82353	0
	ACAAGC	6	1.47059	0	2.94118	0
	GTAGGC	2	0	1.47059	0	0
	GCCAGC	2	1.47059	0	0	0
	GCAAGT	2	1.47059	0	0	0
SLCO1B3	Haplotype	# of Chromosomes	%of Haplotype(AA)	%of Haplotype(ME)	%of Haplotype(AS)	%of Haplotype(CA)
	G	532	100	100	97.0149	100
	A	4	0	0	2.98507	0
SLCO1C1	Haplotype	# of Chromosomes	%of Haplotype(AA)	%of Haplotype(ME)	%of Haplotype(AS)	%of Haplotype(CA)
	TA	478	79.2308	95.5224	91.791	95.3846
	CA	41	20.7692	2.23881	8.20896	0
	TC	8	0	2.23881	0	3.84615
	CC	1	0	0	0	0.769231
SLCO2B1	Only 1 non-singleton SNP
SLCO3A1	Haplotype	# of Chromosomes	%of Haplotype(AA)	%of Haplotype(ME)	%of Haplotype(AS)	%of Haplotype(CA)	*Only core promoter SNPs
	GG	446	86.9231	85.9375	99.2188	76.1905
	G+	64	13.0769	14.0625	0.78125	22.2222
	AG	2	0	0	0	1.5873
SLCO4C1	Haplotype	# of Chromosomes	%of Haplotype(AA)	%of Haplotype(ME)	%of Haplotype(AS)	%of Haplotype(CA)	*Only core promoter SNPs
	GC	310	67.1642	58.3333	66.6667	41.0448
	GT	180	29.8507	35.6061	33.3333	36.5672
	TC	42	2.98507	6.06061	0	22.3881
TAP1	Haplotype	# of Chromosomes	%of Haplotype(AA)	%of Haplotype(ME)	%of Haplotype(AS)	%of Haplotype(CA)
	CCG	293	51.5385	53.0303	56.6176	58.9552	*Only core promoter SNPs
	CAG	213	46.9231	36.3636	37.5	39.5522
	CA-	20	0	8.33333	5.88235	0.746269
	ACG	3	0	2.27273	0	0
	AAG	3	1.53846	0	0	0.746269
TAP2	Haplotype	# of Chromosomes	%of Haplotype(AA)	%of Haplotype(ME)	%of Haplotype(AS)	%of Haplotype(CA)	*Only core promoter SNPs
	TTGTCG	281	56.3492	58.9552	48.5294	50.7812
	GTATTG	217	40.4762	38.806	42.6471	43.75
	TCGTCG	12	0.793651	0	5.88235	2.34375
	TTATCG	5	1.5873	0	0.735294	1.5625
	TTG+CG	3	0	0	2.20588	0
	GTGTTG	2	0	1.49254	0	0
	TTATTG	2	0.793651	0	0	0.78125
	GTATTA	2	0	0.746269	0	0.78125
