# Supplementary material for: Genetic Variation in the Proximal Promoter of ABC and SLC Superfamilies: Liver and Kidney Specific Expression and Promoter Activity Predict Variation
Source: PLoS One. 2009 Sep 9;4(9):e6942. doi: 10.1371/journal.pone.0006942 (PMC2735003; doi:10.1371/journal.pone.0006942)
Supplement: Table S7 — (0.01 MB XLS) [file pone.0006942.s007.xls]

## Sheet: Sheet1
Supplemental Table 7. Membrane Transporter SNPs Significantly Associated with Lymphoblastoid Cell Expression Levels
Gene	SNP	Location	Relative Position	Population	p	R2
ABCA1	rs1800977	Proximal Promoter	-14	European	6.0×10-4	0.19
ABCD2	rs4072006	5' Flanking	-457	Asian	3.5×10-8	0.31
SLC6A16	rs8102658	5' Flanking	-381	Asian	0.001146	0.12
SLC6A16	rs8102574	5' Flanking	-423	Asian	0.001069	0.12
SLC17A3	rs13198474	Proximal Promoter	1	European	0.007488	0.12
