# Supplementary material for: Genetic Variation in the Proximal Promoter of ABC and SLC Superfamilies: Liver and Kidney Specific Expression and Promoter Activity Predict Variation
Source: PLoS One. 2009 Sep 9;4(9):e6942. doi: 10.1371/journal.pone.0006942 (PMC2735003; doi:10.1371/journal.pone.0006942)
Supplement: Table S8 — (0.02 MB XLS) [file pone.0006942.s008.xls]

## Sheet: Sheet1
Supplemental Table 8. Sequencing Primers
Gene	Forward Primer	Reverse Primer	Annealing temp
ABCA1	GATTTAGAGGAAGCAAATTCCACTGGT	GGAGAAAACAGAACCGGGGAAAA	63
ABCA10	GCCAGGTTTTTGCATCATTT	AGTGAGCTGGAAAGCAAAGG	55
ABCA12	TTTCACGGCATAGCTTCCTT	TTCTGCCCTGTGCTTAACCT	60
ABCA13	TGAGATGGGAAGAAGCATCC	TTGTGTTTCTCTTACCGAAAATGA	60
ABCA3	CCTGCAACCCGCTACTGG	CCTTAAGTGAGGGCGACTCC	60
ABCA4	AAGCCCATGCTAATGACCAC	AGCACCAAGCAGCCACTACT	60
ABCA5	CTCCTCGTCCCCTCAACTC	ATCCAAATGCCAGGAGACAG	58
ABCA6	CCACATATTTGGCACAGCAC	AGAGGGTGGGAGCAACAAAT	60
ABCA7	GTCTCTATCCCAGCCCCTTC	GGGACAGAGAGGTCAGGACA	60
ABCA8	TGGTTTATCCACTGAGCTCCT	CAAGTGCCTATGGAATATCTGC	60
ABCA9	TCAGGAAAGCTGGAGGAAAA	TTCTGCTCGCTTCAGTACCA	56
ABCB1	CCTTACCTTTTATCTGGTTGCTTC	TCATTTGAAGGTCTTCCCAGT	58
ABCB10	CAGTGAACGGCGATAGGG	GTATCCAGCACGCTGTCCTC	60
ABCB11	TTAGGGAAAAGTAAGCTCAGGCAAAGGA	AAACCAGAAACACTCCACTCCACAAAGT	63
ABCB4	CCTCTCTCACCTCGAACCTC	AAGTGCTAAGAGGGCACCAA	58
ABCB5	TGGCTGGGTATCTGGCTTAC	CTGCTGCTCCAATGCAATAA	58
ABCB6	GAATGCTCGGTGTTGGACTC	TGCTGGGACTGCTCCTACTC	60
ABCB7	CCTGAGCCGCTAACAGAGAC	TTGCGCAACAGAGAACAATC	60
ABCB8	CTGGGCCCATTTTTCTTTCT	ACCCGAAATAAATGCACCAG	58
ABCB9	GCGCTGCTCATTGAAGACT	CTCCAGAAGGGCAAGGATCT	60
ABCC10	TGCTTCAGGTGAATTTAAGGGTA	CCCACACCATTTCTGATTCAT	58
ABCC11	GGGATCATGAGGAAGACCAG	CCGGAAAGAGAATTGGGAGT	60
ABCC12	GTGGCCAGAAGACCTGCTAC	TTGGATTTAGGTGGCTGGAG	58
ABCC13	GGGAGCGTTTCATTTGTTTT	CCTCTCCTCTCCCCTAAGGA	58
ABCC2	TCTCAGGCAAATAGAACTTTTGAA	TGTAATTTCTCACCCAAAAAGTAGA	60
ABCC3	ATGTGAAAGTAGAGGCCCAGAGACGTG	GGCTCCGTCCCGGGATACCT	61
ABCC4	ATCTCCCGAATTCATCTGGGTCATACTC	AGCGGGTTGGGCTTCACCTC	61
ABCC5	GCATCGGATACAAGGTAGGGAAGAACTC	CAAGTCTCCAGTGTCCCCCGAACT	58
ABCC8	ACAAAGCAGCCGTTGTTGA	TCTGCCCCACTTTTCTCATC	58
ABCC9	ACATGAGGGACCAGGTTGAG	TAGCCATTACTGCAGGCACA	60
ABCD1	ACCGAGTTTCCCACAGTCAA	CTTGGCTCTCCTGTCCTGTC	58
ABCD2	GCGAACAAAACCGGCTCTA	CATGAAACATTGCTCTCATTTATT	63
ABCD3	CGATTGTTTGGTTTCGTCCT	GCTACGGGCCTTCTTACCC	58
ABCD4	GAACTCCTGCTCCCAAACCT	TCCAGAGTAGCTCGGACCAC	60
ABCE1	CTTTAATCGGCACACAAGCA	GAATCTGAGTTTCGGCAAGC	58
ABCF2	CTCCCCTTCCCCTAACTCAC	GAATTCCGTTGGCAACATCT	60
ABCF3	CTCCAAAATGGGCCTGACT	CGACGCTCGCTTAGACTTTC	58
ABCG1	GGCGTTGGAGTGGTTATCTC	GAAGGATGCGCTCACTCAC	58
ABCG2	CAATCACTTTCTAGCCTTTCCACACCAT	GCACAACCCCTTCCCCCAAC	58
ABCG4	AAAGCTGCTGCCATTTTCC	GGAGGAGACGGCAAGGAT	58
ABCG5	AAAGCTGGGCAAATTTTCTG	TCTGGGACCCTGAATCTGTT	58
ABCG8	CTCTCCACCCGATCCACTAA	GGCTGCAGCTCTCTTAGACC	60
CFTR	CAGGAACCCGACTAGGATCA	CTGGGCTCAAGCTCCTAATG	60
SLC10A1	AGCTGGTTATTCCCTCTGATGGTAAGCA	TGAAGAACAACATGAACACCAGGATGAC	63
SLC12A3	GCAGAAATGAAATCCACAAGCAGACAG	ACATCGATCGTGTTGTAGCCAAAGGT	61
SLC15A1	GTGCGTTCCTCCCACAGTGGTTT	CTCTGGGCACCTCTGGCTTCC	63
SLC15A2	GAACAAATTTCTTAACCTCTGGGAACATT	TGAATCTAAGGACTCACCGGAGATGG	63
SLC16A1	CATCCATTCAAATGCTGCCCATTC	GCTCGCTGCCTCGTTTGCTTGT	61
SLC17A1	TTCCACATGGAATCTGTGATG	GCCTCTGCTTGAGTTGATCTT	58
SLC17A2	CCCCTTAATGGACCTTTGGT	TCCTGAAGAGGAATGAACACC	60
SLC17A3	AACTTGGGGTTGGGGAGTAT	CAGGCTTGTTTGGTTTGGTT	60
SLC17A4	TGCCATAAAAGGGAGGAGAA	CCACAATCTCTGCCCCTAAA	60
SLC17A6	GGTGTCTTGGAACACCACAAGCATAAGT	CATGCAACCCACGGGTTTCCTAATA	63
SLC17A7	CAAAGCTGTGAGACCCAGAGACACAG	GTTGTGTCCCCTTCTCCTAGGATCTGTC	61
SLC17A8	ACCTAATGCATGTGGGGCTTAAAA	TCGTGGAGGGAACTACTCAAAATCAAAA	63
SLC18A1	CAGATGTTGGGTTTTTATGGCTTGAGAA	GAAAGATTAAATTTGTCCGGAGAGAGAAAAA	63
SLC18A2	CTAGCCCTTTCTCTGAGGCCAGGTGTA	CAACTGTGCCACCTCCCAAACTG	61
SLC19A1	AGTGTGACTGCGCTGCCGTCTG	AGCCCCCACACTCACCTCACAG	61
SLC19A2	AGTGAGGGTCAGGCACTTGT	TGGGCTTCTGATGTCTTTCC	60
SLC22A1	GCCGAATACAGTATCTAGTACCTGGCTGTCA	GAAGACGATGCCCACACAGATGG	63
SLC22A10	TGGTAATTGGGATTTGCATTT	ATGGCTGCAGCAAAGTTCTC	58
SLC22A11	GGAGGGCTGGCTTCACTCTACCTC	TCCAGGAGTGACTGTGCGGATG	63
SLC22A12	GCAGGAGTTGAGGCAGAAAGACAAGG	CTGTGTGCCCACCTCCCAGAGT	61
SLC22A13	GGCTGGCTGGTTGCTATAAG	CAGCAGCACTCAGGTTGAAA	60
SLC22A14	GCTTAGTTTCCCCTCCTTGC	CTCCTCTCCTGCCATCTGTC	56
SLC22A16	CCCATACCTGCCGAAGTG	TACAGGCGTGAGCAAGTG	58
SLC22A17	CTCCCAGCCAGAGGCATTAG	GCAACTGAGCCAGAGGACA	60
SLC22A18	CAGAGCTGTCTCCTGGTCACT	GTGCTCGAGTACCTGCCTTT	60
SLC22A2	CAGGAGAAGGTCAGAGAGAGAGACTTTGC	TTCTGGAAAAAGTGAAACTCCCCTCCAT	58
SLC22A3	GTTGGGTGATCAAATCCCAAGTTGTAGC	CCGTGCGGTTCCACTCCTCCTC	61
SLC22A4	CCTGTTTTCCCTGTGCAAGATGAGG	GCCGCTCCGAAACTTGCAACTAC	63
SLC22A5	GACCCTGGGCCAGTGACTTTCT	CAGCAGGCGACCCAAGACC	61
SLC22A6	TAAGGGAAAAATCTGACCCTTGGAA	AGCTGAGTCCGAGCTGCTCTGTG	63
SLC22A7	CGCCATTCCCTATCCCTCCAAA	AGCAGTGCCACATTCCGCAGTT	61
SLC22A8	TGAAAATAAAACAGCAGGGACTACATTTGG	AGAGGGCACTAGGGGCTTGGCTAGT	63
SLC22A9	TTTGCCTCCAATTCTTCCAC	TCGTTTTGGGGTCAGATAGG	63
SLC28A1	CTCTGCTGGATGGTGAGGGAAATTATCT	AAAAGGACGCTACCTGCTTTTCCACTTT	63
SLC28A2	TTACAAGCCTGCACCACCATGC	GGCCTTCCTGACTAGGCACAAAACT	60
SLC28A3	TGGCATGATCTTTGCTCTCTGC	AGGACGGAGAATGGAGATGACTTTTACC	63
SLC29A1	TCCCAGGCAATAATCCTCTCTC	CCCTAGTTCTCTCCCTCCTCATCT	60
SLC29A2	CGGCTGATGGGAATTGTAGT	ACCTGTGGCAGCTCTGGTT	60
SLC29A3	GACTGCCATGTTCTGGGTCT	GGATGGGGTAGGGTCCTG	60
SLC31A1	CATCAGCCCCAGCTGACTCCTATAAAA	CTCCAGTCCCGAGCTCTTTCTCCTT	63
SLC32A1	AGGATGGGTGCCAGGGAAACTGACT	CAGCGGCGTCAGAGCAGCTACG	63
SLC3A2	CCACACACTCAACGAAAGAGCAGAGATT	CTCAGAACAGGGTTAGAGGGTAGGCAGT	63
SLC47A1	GGGAGCATGTTGCTCTATCC	AGGAGCTTCCATGTGACTCG	58
SLC47A2	GACAGCTTTCAGGAGCCATC	CTGGACCTTCTCCTGCTGAG	60
SLC6A12	CACCCATTCCCATACACACA	GGAAGCGAGACTCTGTGGAA	60
SLC6A14	TCTCAGATGGCTGCTTTTCA	GGGCATTTCAACTTGTCCAT	60
SLC6A15	CAGCTTCTTGCCTAGGTTGG	ATGCCCAGAGGCTTTTTCTT	56
SLC6A16	GCTTCTGCCAGGTTCTTCAG	CGGAAAGTATGAGAACGGATG	56
SLC6A17	GGTTCCCTCACGTCTGTGAT	CGGGATTGCGAAGACTGG	58
SLC6A18	CCCAGCACAGGAGAGGACT	CATGAGCCATGGTGACTGAG	56
SLC6A19	TGGTGTGAGCAGACCAAGAG	CATGTACTGCGCCTTGTTGT	55
SLC6A2	AGCAGAGGGCTAGCGAGTTT	GATCTTCTTGCCCCAGGTCT	60
SLC6A20	TACATCTGGCACAGGTACGG	TAGGTGTCTTCCTCGCGTCT	60
SLC6A3	CGGGAAATGGTTTTCTTAGGCGAGT	GACTGTTGGCGACTTTGGAGACG	61
SLC6A4	TTTTTGACGCAGCTTTGAACTGTAGCTG	GCATGCACCTCCTCGCCTCCTC	63
SLC6A5	CCAGGATTCCTCCAAGACTG	GGAGAGGCGCTTTCTATATCTC	60
SLC6A7	CTTCTGCTCACCCAAACCTC	CGCATAGACACCCAGACAGA	58
SLC6A9	GGGCAGCGTCAATTACTTTC	AGTCCCCCTTTGTCTGGACT	58
SLC7A11	CCTGTGTATGCATCGTGCTC	TTGGATTTGACTGTATTGCCTTA	60
SLC7A5	GGACCCCTGCACCTCCCTTATTAATTC	CGGAGCTCTAACAGTAAACCGATTGCTC	60
SLC9A3	AAGCCCTGGGGGTATCGAATTGTTTT	CTCGAAGGTGACCACCTGGAAGC	61
SLCO1A2	ATTAAAATTCCGTGTCTCCCCAGGTTTC	GTTGCTCTTCAGGGTGTTCCAAGCTATT	63
SLCO1B1	TGAGAGAAGGGTCTGTACTTTATTTCAGAAGA	TTTTAAGGGCTCAGAATGTAAGCGTGTG	63
SLCO1B3	ACAGCCATGTGCCTGAGATATAGTAGGG	TAAGGGCTCAGAACAAAAGTGTGGAGAA	63
SLCO1C1	TGAATGCCAAAAATTCAACG	CCTCTTTCTTCCTGGCCTCT	60
SLCO2B1	ACAACTGAGGTGGGACCCAGATCTCTC	AGACAGCAGCAGGTGAGCCACA	63
SLCO3A1	ACCTCCCCAAGACCCAGAGCAC	TTTTTCTTGTTCCTCTGCGCCTCGTC	61
SLCO4C1	ACCGCCTGAACCTTCCTACT	AATTCTGTAACCGGGCCTTT	58
SLCO5A1	TGTCTGCCTGGCTGAGTAGA	GTGCCTCTGTTCTTCCTGCT	60
SLCO6A1	GCCTACGAACATGGCTCAC	GTGCCCTCATTTAAGGTGGA	60
TAP1	GCCGCCTGCTCACTAGATAA	CTATGCTCATTGCGGGTTG	58
TAP2	AGGAGCGTGGAGTGGGTAGT	CGGACCAGAAAGAAGGCACT	60
