# Supplementary material for: Genetic Variation in the Proximal Promoter of ABC and SLC Superfamilies: Liver and Kidney Specific Expression and Promoter Activity Predict Variation
Source: PLoS One. 2009 Sep 9;4(9):e6942. doi: 10.1371/journal.pone.0006942 (PMC2735003; doi:10.1371/journal.pone.0006942)
Supplement: Table S9 — (0.01 MB XLS) [file pone.0006942.s009.xls]

## Sheet: Sheet1
Supplemental Table 9. Sequences of oligonucleotides for constructing the promoter regions of the membrane transporters. The nucleotide sequences in bold font represent the specified restriction enzyme sites.
Gene	Forward Primer (Restriction Enzyme)	Reverse Primer (Restriction Enzyme)
ABCB1 - forward	5'-ATAACGCGTGCCATGTAACTCTTCGAGGTTT-3' (MluI)	5'-ATAAGATCTTGGTTGCTTCCTGAAGTGAG-3' (Bgl II)
ABCB11 - forward	5'-ATAACGCGTAGGGTTGGGATAGCCTGAAT-3' (MluI)	5'-ATAAGATCTGAAGCCAGAGGAAATAATGGA-3' (Bgl II)
ABCC5 - forward	5'-ATAACGCGTGGACTGCTCTGCCTACGAAC-3' (MluI)	5'-ATAAGATCTATGAGCCCTGCAGCAAAAC-3' (Bgl II)
ABCG5 - forward	5'-ATAACGCGTGCTCACTCACCGAGGTATCC-3' (MluI)	5'-ATAAGATCTCCCCAGAGTGGCTTCAGTT-3' (Bgl II)
SLCO1A2 - forward	5'-ATGCACGCGTATTAAAATTCCGTGTCTCCCCAGG-3' (MluI)	5'-ATGCAGATCTGTTGCTCTTCAGGGTGTTCCAAGCTAT-3' (Bgl II)
SLC22A2 - forward	5'-GCTAGCAGCGTGTTTTCTCCATAGGGCCTTGA-3' (NheI)	5'-AAGCTTCTTGAGGCTGCCCGACGTG-3' (HindIII)
SLC22A3 - forward	5'-ATACTAACGCGTCTGCTGGCAGGGACCAAAAGGAGCTC-3' (MluI)	5'-ATACTAAGATCTCAGCG CCT CGTCGAAGGAGGGCTTGGTGCGC-3' (Bgl II)
SLC22A4 - forward	5'-GCTAGCGACAACCGAGAACGAGCTTC-3' (NheI)	5'-AAGCTTTCCCCAAGGATGTTAGAACG-3' (HindIII)
SLC22A5 - forward	5'-GCTAGCGTGCGTTTTCAACACTGGAG-3' (NheI)	5'-AAGCTTCTTACATAGGGCGCACGAC-3' (HindIII)
SLC22A6 - forward	5'-GCTAGCCTCAAGAGGCCACCACACTT-3' (NheI)	5'-AAGCTTCTCAGCTTTCAGGGTCTGCT-3' (HindIII)
SLC22A7 - forward	5'-GCTAGCACCCAGCTACCTCATCATCATGG-3' (NheI)	5'-AAGCTTAACTGCCCACCACATAGACC-3' (HindIII)
SLC22A8 - forward	5'-GCTAGCGTTGGGCGGATGTACAAAAC-3' (NheI)	5'-AAGCTTCGGCAGCTGCTGTAGTAGG-3' (HindIII)
SLC22A16 - forward	5'-ATAACGCGTAGTTCTGCAGTAGATTCTTAGGCA-3' (MluI)	5'-ATAAGATCTGGTGCGGCCGTGCACTGGGCGCCG-3' (Bgl II)
SLC28A1 - forward	5'-ATAACGCGTATGGGACCTGTGACAGCAAT-3' (MluI)	5'-ATAAGATCTTTTCTGTCAGCATCCAGAGG-3' (Bgl II)
SLC28A2 - forward	5'-ATAACGCGTTATCCTGGCTGGTCTCAAGCG-3' (MluI)	5'-ATAAGATCTATCTCTTTAAAAATTTGTAAAT-3' (Bgl II)
SLC28A3 - forward	5'-ATAACGCGTCCTCTAACTCCAGGCTGCAC-3' (MluI)	5'-ATAAGATCTCTTCTTTTCCCCCACACTGA-3' (Bgl II)
SLC29A1 - forward	5'-ATATACGCGTCCGCCCCACCCCCAGCCCTGC-3' (MluI)	5'-ATATAGATCTGGCCTGACCGGTGTGGGCCG-3' (Bgl II)
SLC29A2 - forward	5'-ATAACGCGTAGCTTTAGGGGTCGCAGGAG-3' (MluI)	5'-ATAAGATCTGGCTGGAGTCGCACAGGTAG-3' (Bgl II)
SLC29A3 - forward	5'-ATAACGCGTGAAGGAGCAGCAACCAAAAG-3' (MluI)	5'-ATAAGATCTGGACCGTAGCCGGAAGAG-3' (Bgl II)
SLC47A1 - forward	5'-CTAGCTAGCGGTGCAGAGAGAGGTGCAA-3' (NheI)	5'-CCCAAGCTTGCTGCGGCCGGGTAG-3' (HindIII)
SLC47A2 - forward	5'-CTAGCTAGCCCTAGCCTTTCATGCCTCAG-3' (NheI)	5'-CCCAAGCTTGCACTGGCTACCCTGCAC-3' (HindIII)
